# Supplementary material for: Tuning the electrical properties of graphene oxide through low-temperature thermal annealing
Source: Royal Society of Chemistry journal article supplement (doi:10.1039/d2nr06091d), 2023-01-01
Supplement: d2nr06091d1.pdf [file d2nr06091d1.pdf]

## Electronic Supplementary Information

### **Tuning Electrical Properties of Graphene Oxide through Low-Temperature Thermal Annealing**

*Cataldo Valentini,<sup>a</sup> Verónica Montes-García,<sup>a</sup> Pietro Antonio Livio,<sup>a</sup> Tomasz Chudziak,<sup>b,c</sup> Jesús Raya,<sup>d</sup> Artur Ciesielski,<sup>\*a,b</sup> and Paolo Samorì<sup>\*a</sup>*

#### **Table of contents**

|                                                                                  |           |
|----------------------------------------------------------------------------------|-----------|
| <b>1. TGA characterization</b> .....                                             | <b>3</b>  |
| <b>2. AFM characterization</b> .....                                             | <b>5</b>  |
| <b>3. Resistivity characterization</b> .....                                     | <b>6</b>  |
| <b>4. Bending characterization</b> .....                                         | <b>7</b>  |
| <b>5. XPS characterization</b> .....                                             | <b>8</b>  |
| <b>6. NMR characterization</b> .....                                             | <b>11</b> |
| <b>7. Raman characterization</b> .....                                           | <b>12</b> |
| <b>8. PXRD characterization</b> .....                                            | <b>17</b> |
| <b>9. BET characterization</b> .....                                             | <b>20</b> |
| <b>10. Photoelectron Yield Spectroscopy in Air (PYSA) characterization</b> ..... | <b>21</b> |
| <b>11. Electrochemical characterization</b> .....                                | <b>22</b> |

**Table S1.** State-of-the-art of the thermal annealing conditions of GO at low temperatures.

| Sample                         | Ambient                                                         | Temperature (°C) | Time                 | Resistivity / Sheet Resistance     | Reference |
|--------------------------------|-----------------------------------------------------------------|------------------|----------------------|------------------------------------|-----------|
| Film                           | UHV                                                             | 125-240          | 17 h                 | n.a.                               | 1         |
| Film                           | UHV                                                             | 150              | 15 min               | $\sim 10 \Omega\text{m}$           | 2         |
| Film                           | UHV                                                             | 200              | 15 min               | $\sim 10^{-2} \Omega\text{m}$      | 2         |
| Film                           | Ar/H <sub>2</sub>                                               | 200              | 15 min               | $\sim 10^{-2} \Omega\text{m}$      | 2         |
| Film                           | Ar/H <sub>2</sub>                                               | 600              | 15 min               | $\sim 10^{-4} \Omega\text{m}$      | 2         |
| Film                           | Ar/H <sub>2</sub>                                               | 1100             | 15 min               | $\sim 10^{-5} \Omega\text{m}$      | 2         |
| Film                           | N <sub>2</sub> H <sub>4</sub> vapour                            | 80               | 7 h                  | $\sim 10^{-3} \Omega\text{m}$      | 2         |
| Film                           | 1) N <sub>2</sub> H <sub>4</sub> vapour<br>2) Ar/H <sub>2</sub> | 1) 80<br>2) 200  | 1) 24 h<br>2) 15 min | $\sim 10^{-4} \Omega\text{m}$      | 2         |
| Film                           | 1) N <sub>2</sub> H <sub>4</sub> vapour<br>2) Ar/H <sub>2</sub> | 1) 80<br>2) 1100 | 1) 24 h<br>2) 15 min | $\sim 10^{-5} \Omega\text{m}$      | 2         |
| Film                           | UHV                                                             | 200              | 2 h                  | $10^{-2} \Omega\text{m}$           | 3         |
| N,N-dimethylacetamide solution | N <sub>2</sub>                                                  | 150              | 5 h                  | n.a.                               | 4         |
| Powder or aqueous solution     | Aqueous in a autoclave, vacuum, or air                          | 95-150           | 15 h                 | n.a.                               | 5         |
| Powder                         | N <sub>2</sub>                                                  | 150              | 2 h                  | 48 $\Omega\text{m}$                | 6         |
| Powder                         | N <sub>2</sub>                                                  | 200              | 2 h                  | $2 \cdot 10^{-3} \Omega\text{m}$   | 6         |
| Powder                         | N <sub>2</sub>                                                  | 500              | 2 h                  | $5 \cdot 10^{-4} \Omega\text{m}$   | 6         |
| Powder                         | N <sub>2</sub>                                                  | 900              | 2 h                  | $10^{-3} \Omega\text{m}$           | 6         |
| Powder                         | Vacuum                                                          | 80               | 5 days               | $10^5 \Omega\text{sq}^{-1}$        | 7         |
| Film                           | N <sub>2</sub>                                                  | 75-250           | 45 min               | n.a.                               | 8         |
| Film                           | Vacuum                                                          | 200              | 12h                  | n.a.                               | 9         |
| Powder                         | Air                                                             | 300              | 2h                   | n.a.                               | 10        |
| Film                           | Air                                                             | 100-250          | 15 min               | $4 \cdot 10^{-2} \Omega\text{m}$   | 11        |
| Film                           | Air                                                             | 70-300           | 15 min               | n.a.                               | 12        |
| Film                           | Ar/H <sub>2</sub>                                               | 100-500          | 10 min               | n.a.                               | 13        |
| Film                           | Air or Ar                                                       | 130-300 °C       | 4 and 24 h           | $10^{-2} - 10^{-4} \Omega\text{m}$ | This work |

UHV=Ultrahigh vacuum; n.a. = not available

### 1. TGA characterization

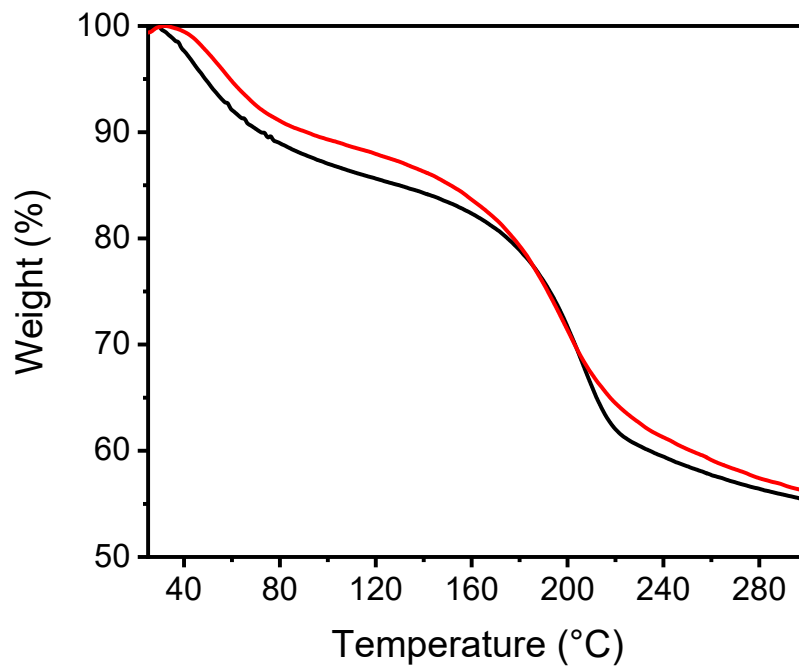

**Figure S1.** TGA diagram for the annealing of GO under air (black curve) and N<sub>2</sub> (red curve).

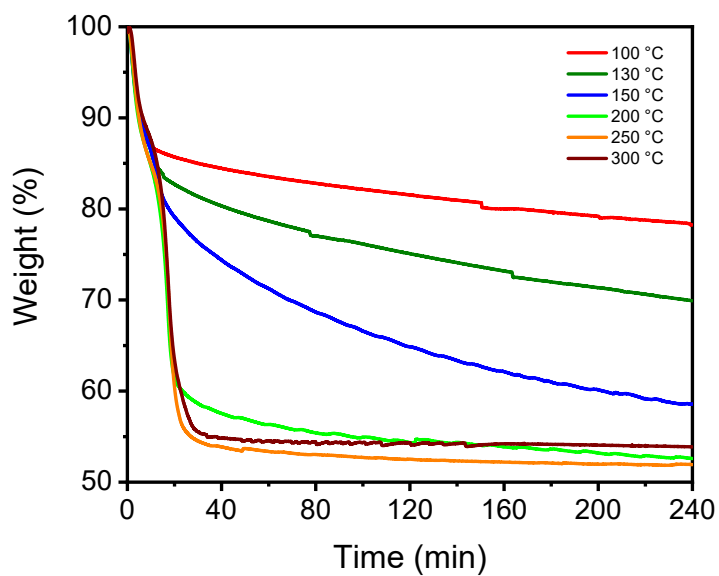

**Figure S2.** Kinetic TGA for the annealing of GO under N<sub>2</sub> at different temperatures during 4h.

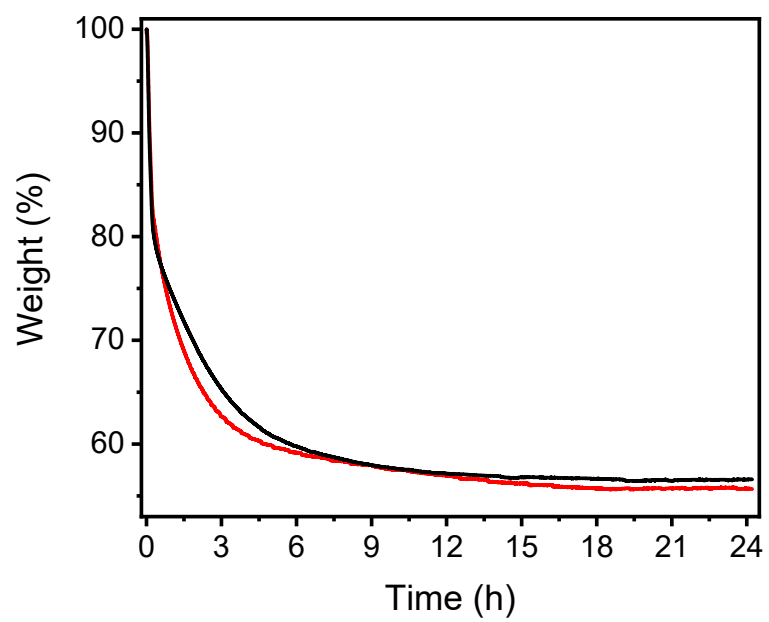

**Figure S3.** Kinetic TGA for the annealing of GO under air (black curve) and N<sub>2</sub> (red curve) at 150°C for 24h.

## 2. AFM characterization

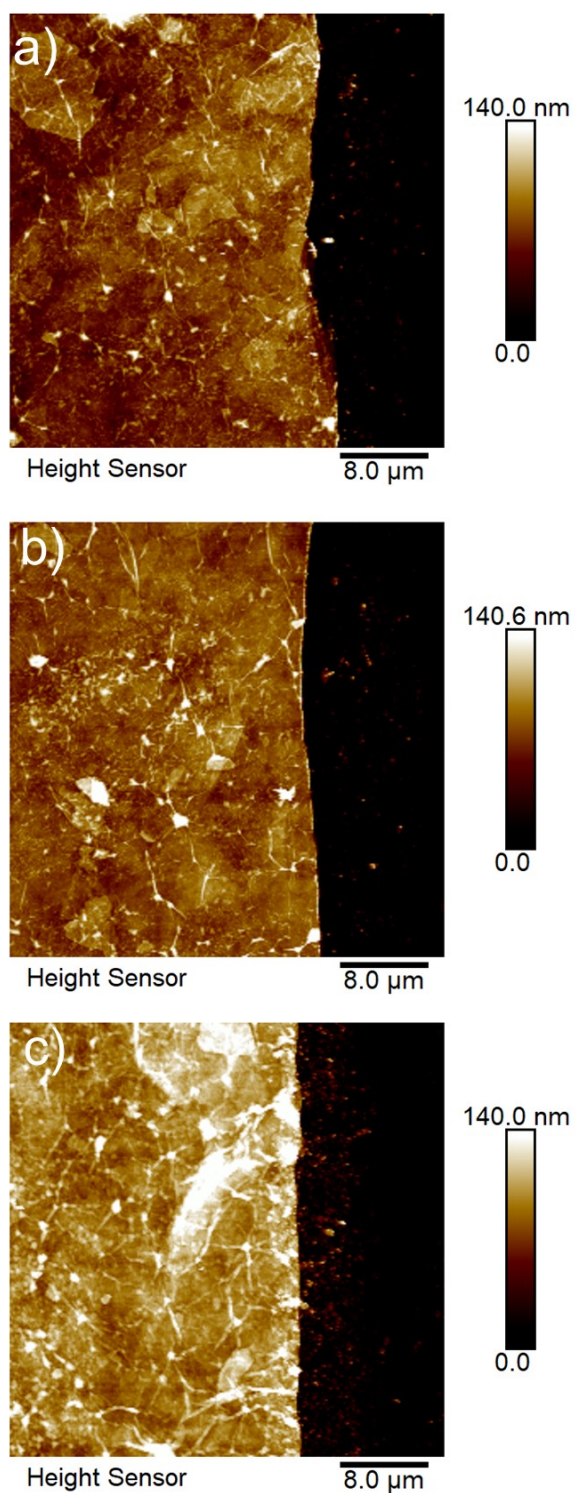

**Figure S4.** AFM images of pristine GO films a) sample 1, b) sample 2 and c) sample 3.

**Table S2.** Film thickness calculated from AFM images.

| Conc (mg/mL) | Sample 1 (nm) | Sample 2 (nm) | Sample 3 (nm) | Avg (nm) | $\sigma$ (nm) |
|--------------|---------------|---------------|---------------|----------|---------------|
| 10           | 78.5          | 65.87         | 55.4          | 66       | 11            |

### 3. Resistivity characterization

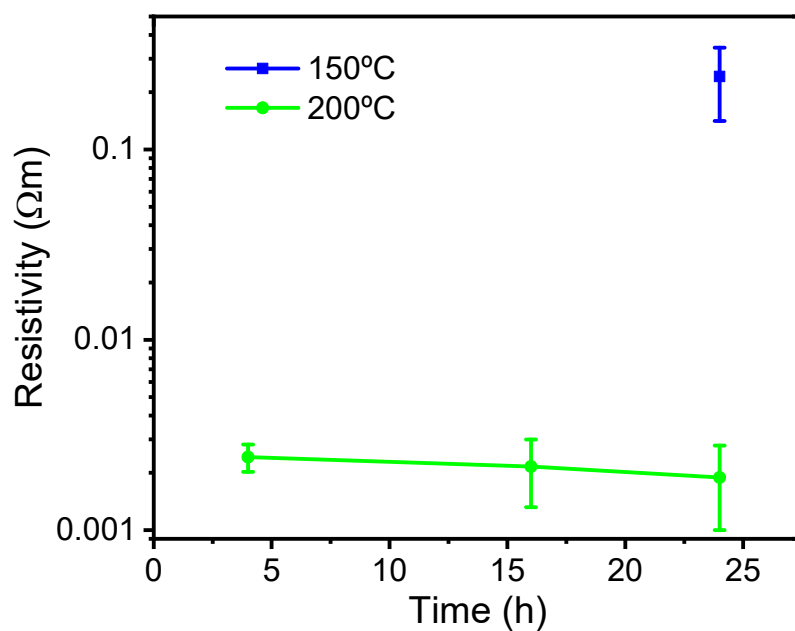

**Figure S5.** Kinetic resistivity measurements for the annealing of GO under argon at 150°C and 200°C.

#### 4. Bending characterization

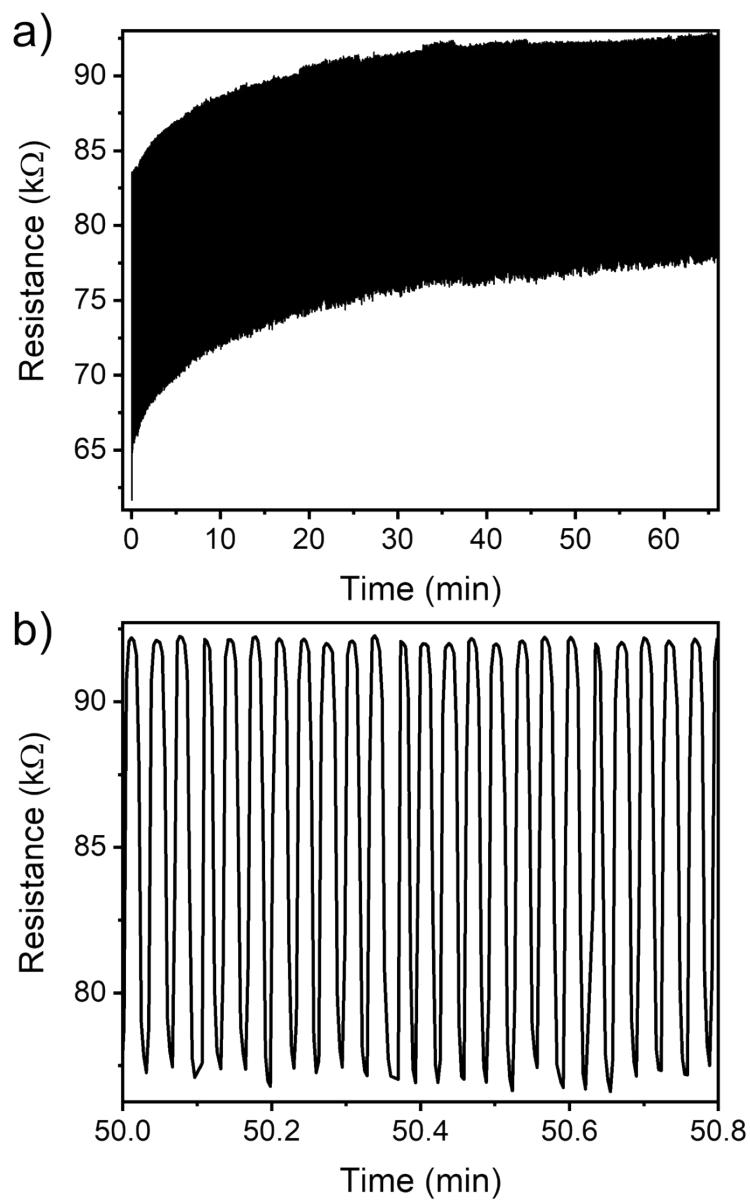

**Figure S6.** a) Resistance of the film as a function of time during the application of 2000 bending cycles with a bending radius of 6 mm, b) magnification of the film resistance as a function of time.

## 5. XPS characterization

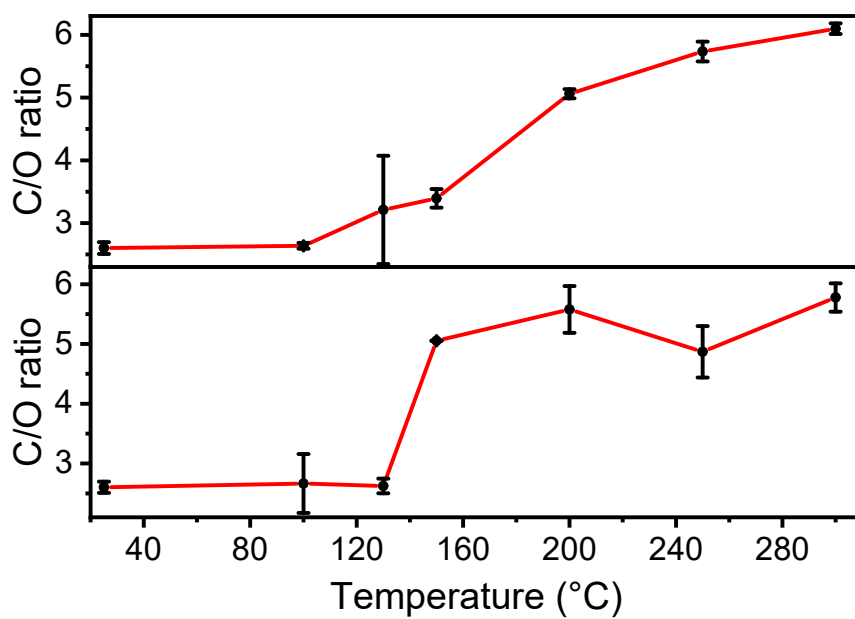

**Figure S7.** C/O ratio obtained from the XPS analysis of the TrGO under N<sub>2</sub> (top) and air (bottom).



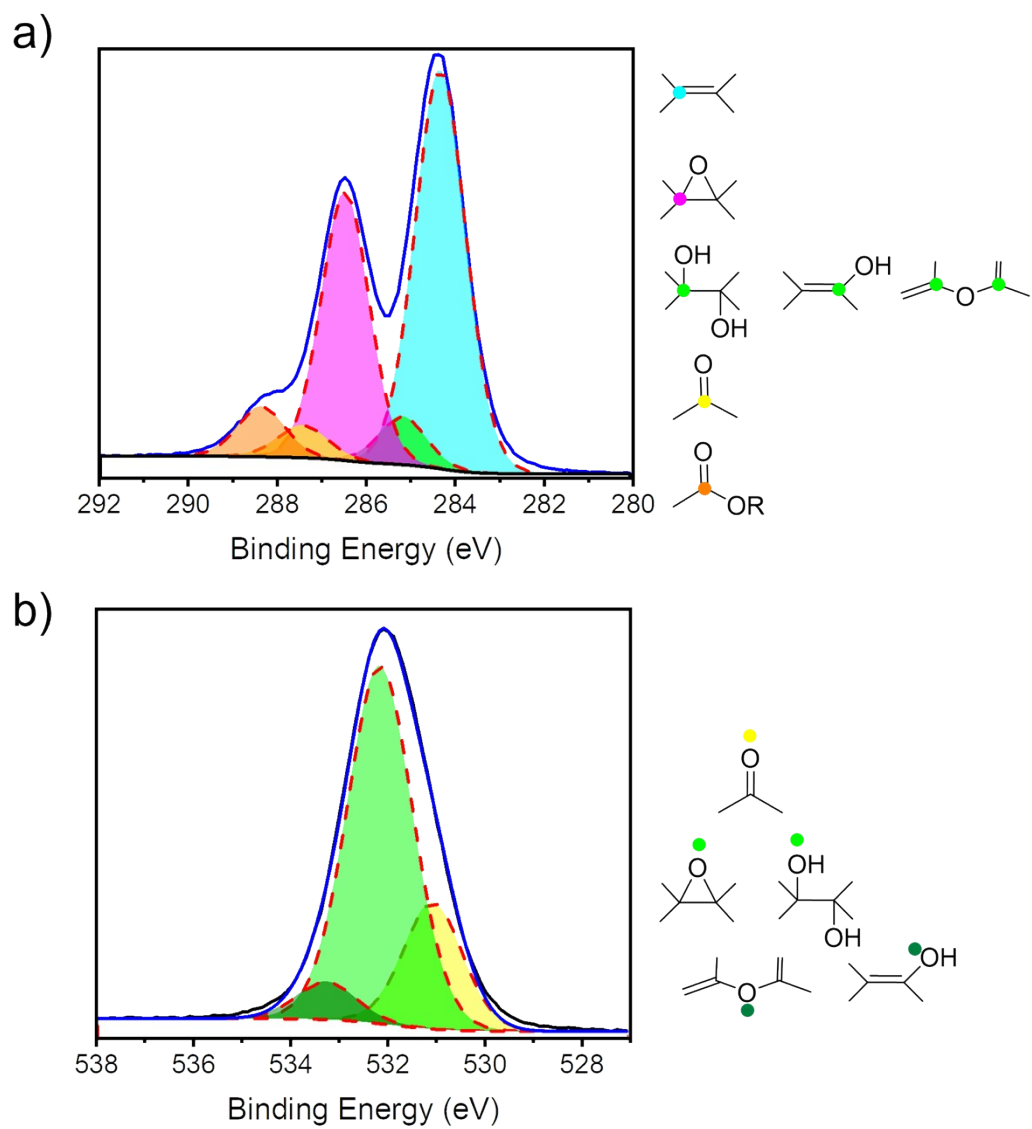

**Figure S8.** Fitted XPS a) C1s and b) O1s spectrum of GO and their corresponding chemical groups.

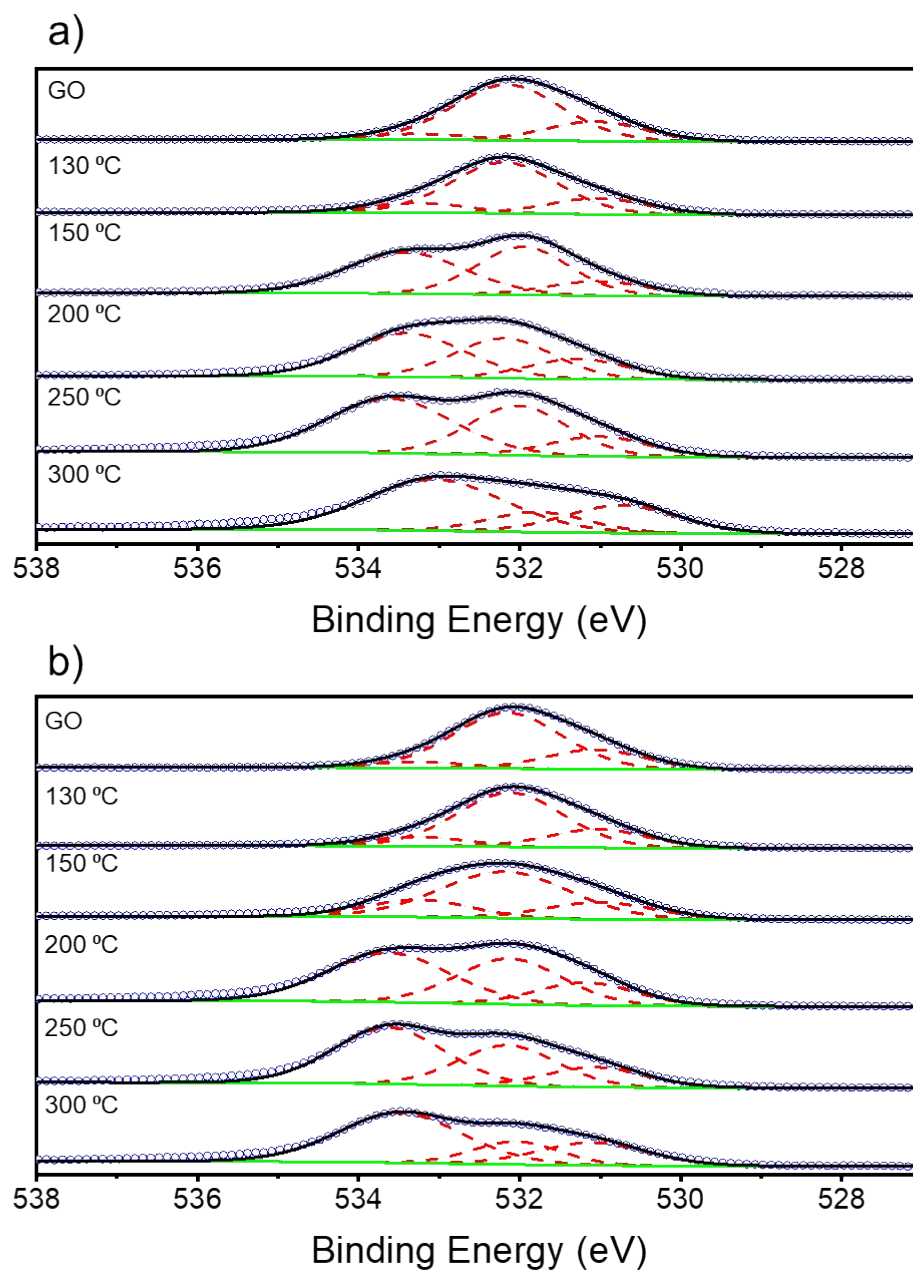

**Figure S9.** XPS analysis of O1s for the TrGO under (a) air and (b) N<sub>2</sub>.

## 6. NMR characterization

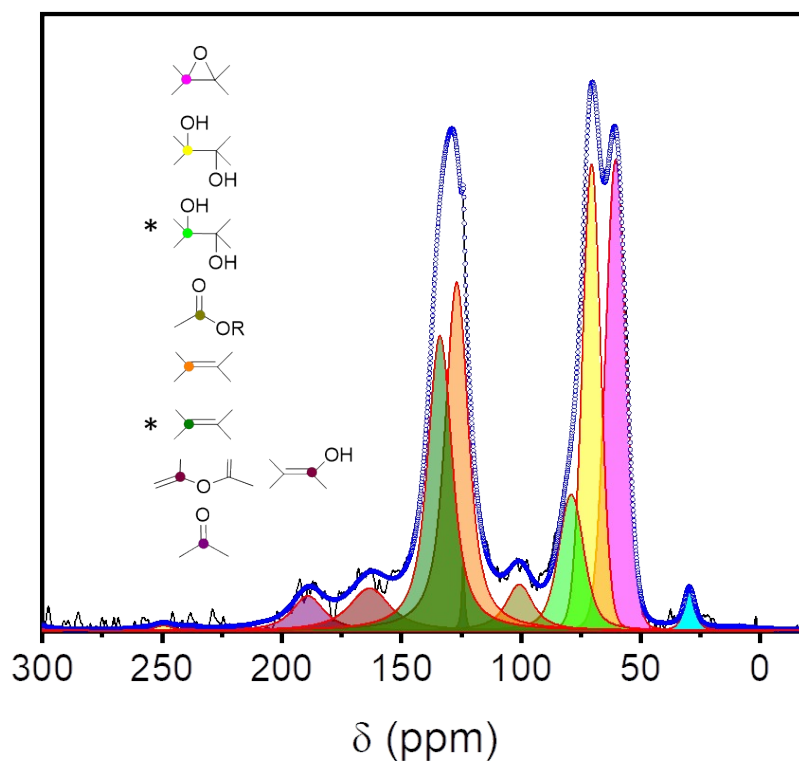

**Figure S10** Fitted ssNMR spectrum of GO and their corresponding chemical groups. The stars refer to the chemical groups close to defects.

## 7. Raman characterization

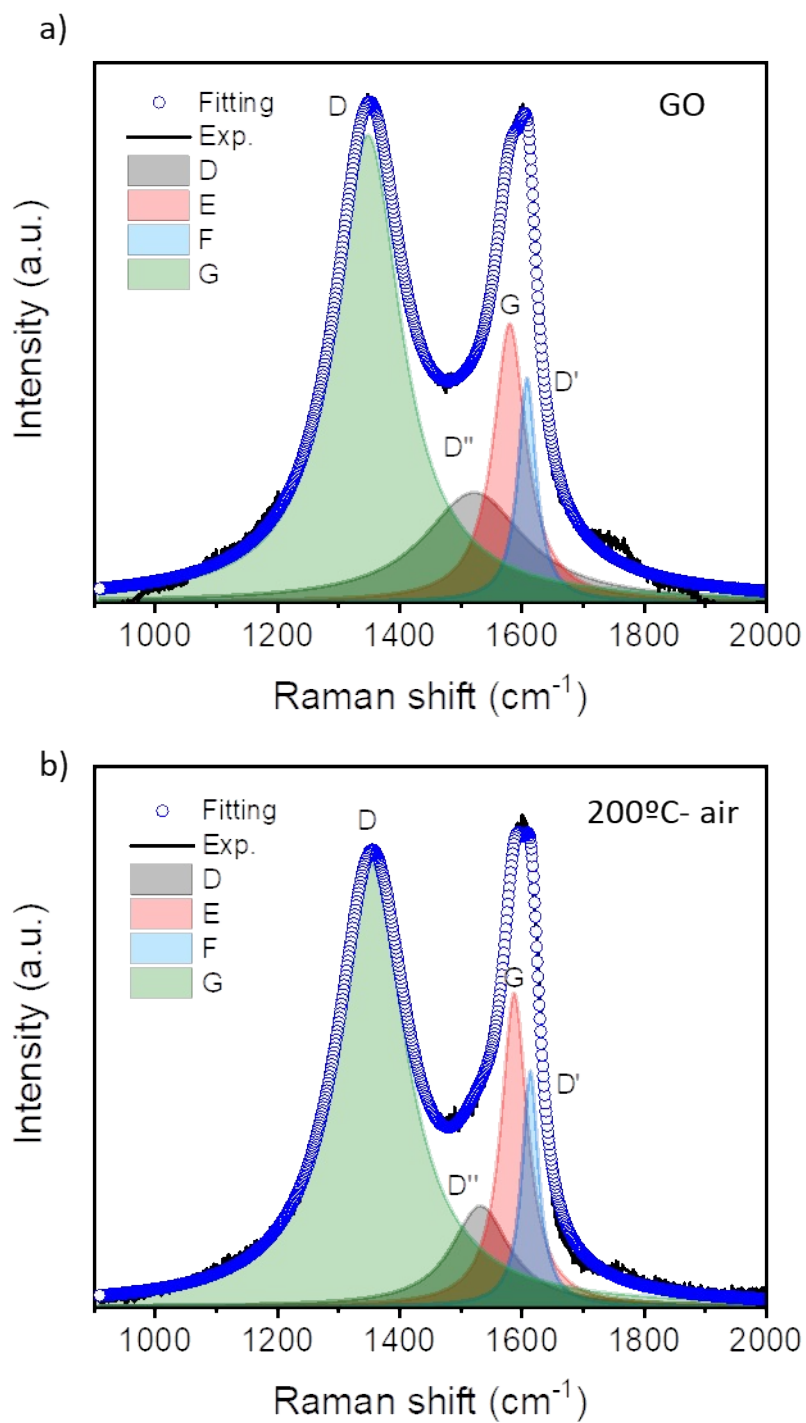

**Figure S11.** Fitted Raman spectra of (a) GO and (b) TrGO at 200°C under air.

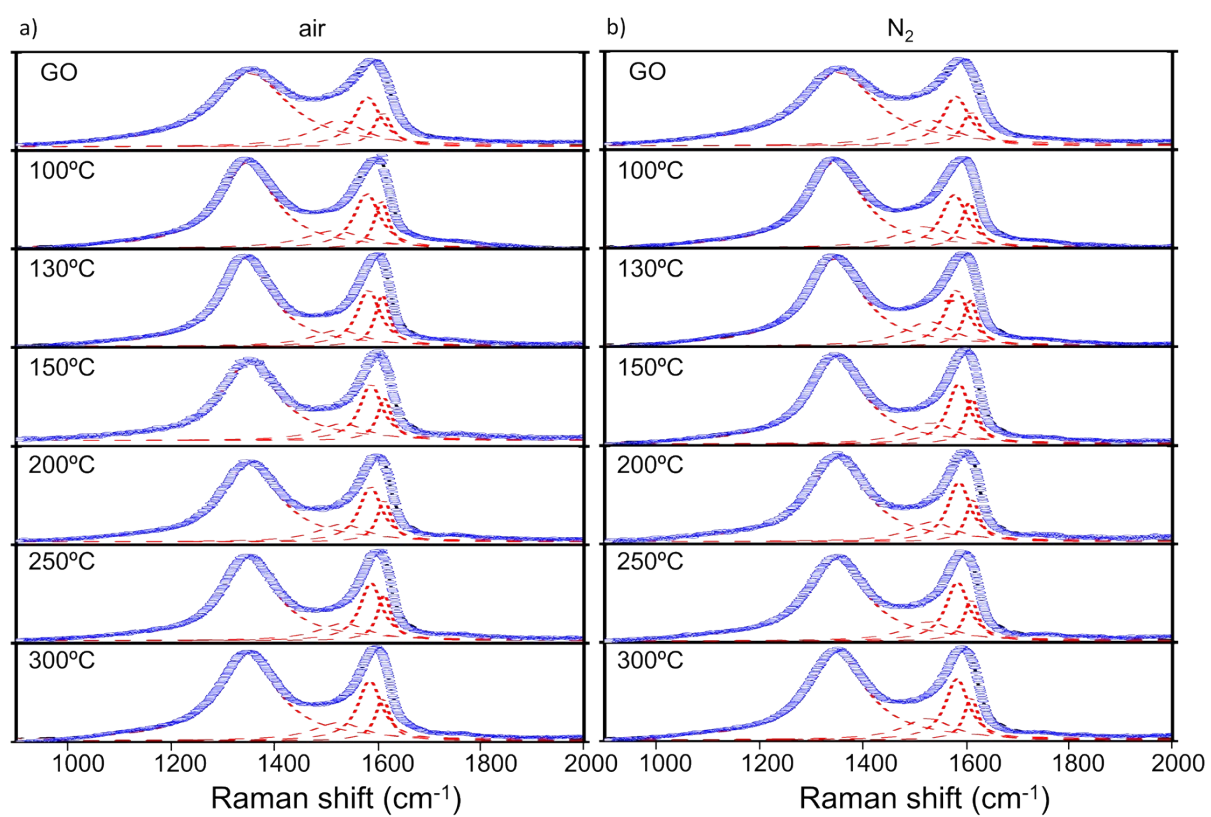

**Figure S12.** Fitted Raman spectra of GO and TrGO under (a) air and (b) under  $N_2$  at different temperatures.

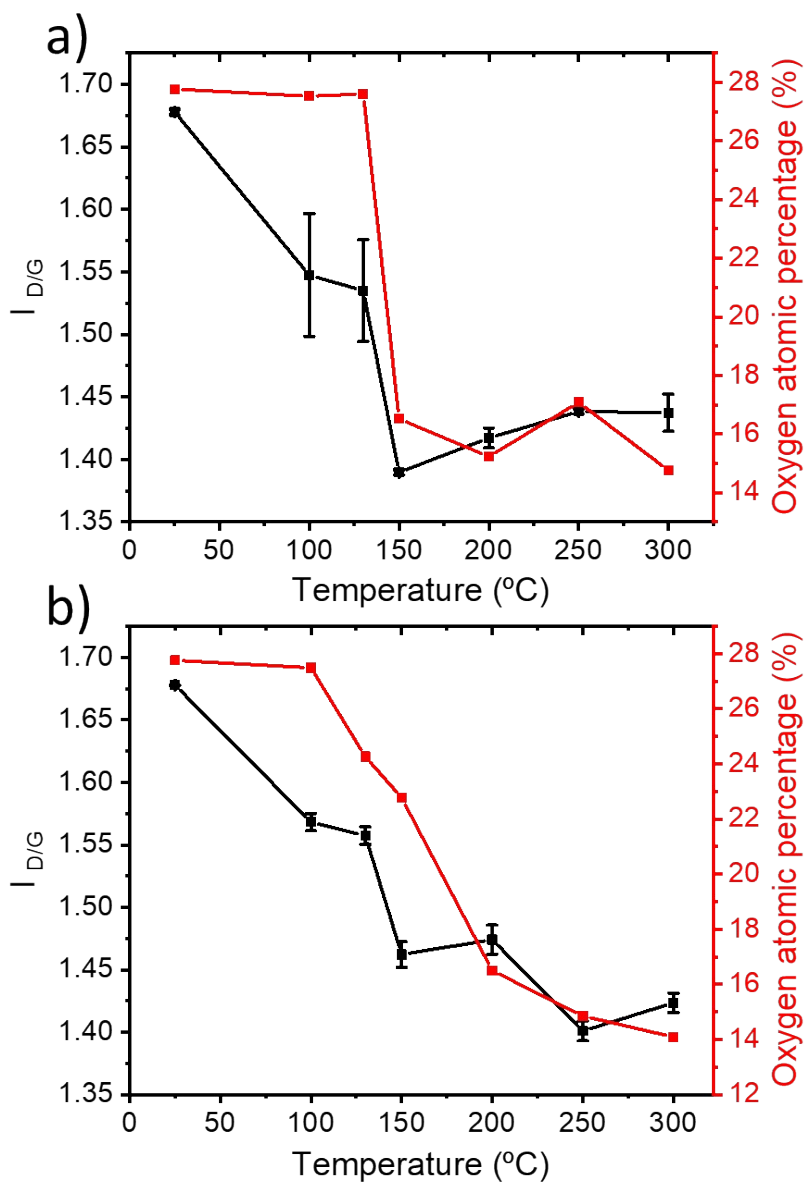

**Figure S13.** Evolution of the  $I_{D/G}$  ratio values and the oxygen atomic percentage of TrGO as a function of the annealing temperature under (a) air and (b) under  $N_2$ .

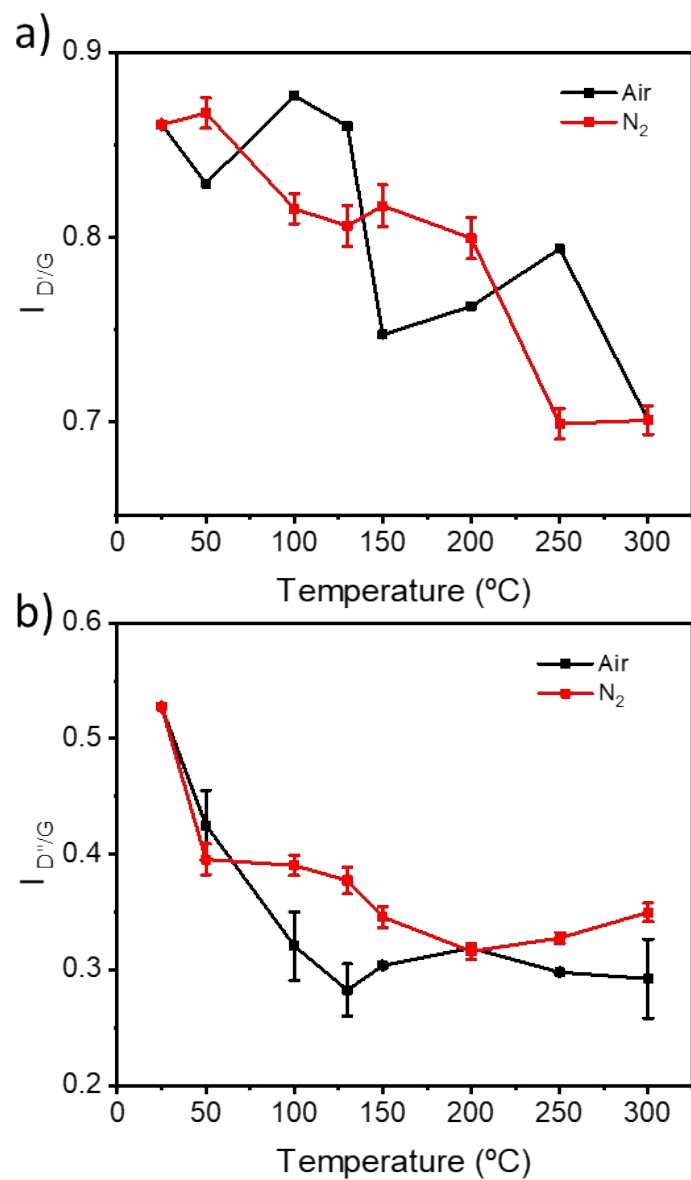

**Figure S14.** Evolution of the (a)  $I_{D'}/G$  and (b)  $I_{D''}/G$  ratio values of TrGO as a function of the annealing temperature under air (black curves) and under N<sub>2</sub> (red curves).

**Table S3.** Fitting parameters calculated for GO and TrGO Raman spectra under air.

| Air   | D''                   |                      | G                      |                      | D'                     |                      | D                      |                      |
|-------|-----------------------|----------------------|------------------------|----------------------|------------------------|----------------------|------------------------|----------------------|
| T(°C) | Rs(cm <sup>-1</sup> ) | w(cm <sup>-1</sup> ) | Rs (cm <sup>-1</sup> ) | w(cm <sup>-1</sup> ) | Rs (cm <sup>-1</sup> ) | w(cm <sup>-1</sup> ) | Rs (cm <sup>-1</sup> ) | w(cm <sup>-1</sup> ) |
| 25    | 1523.1                | 200.0                | 1581.6                 | 66.1                 | 1610.2                 | 36.5                 | 1349.3                 | 135.0                |
| 50    | 1523.7                | 198.4                | 1581.0                 | 63.7                 | 1610.2                 | 36.1                 | 1349.2                 | 134.8                |
| 100   | 1518.8                | 143.1                | 1582.1                 | 61.2                 | 1610.4                 | 33.6                 | 1349.2                 | 130.9                |
| 130   | 1526.9                | 120.1                | 1585.3                 | 54.6                 | 1611.9                 | 33.6                 | 1348.1                 | 120.8                |
| 150   | 1534.2                | 113.0                | 1589.9                 | 52.5                 | 1616.0                 | 32.9                 | 1354.2                 | 136.4                |
| 200   | 1533.6                | 115.5                | 1589.1                 | 53.5                 | 1615.5                 | 33.4                 | 1354.7                 | 139.5                |
| 250   | 1536.1                | 115.6                | 1589.9                 | 51.4                 | 1615.4                 | 31.8                 | 1352.7                 | 127.8                |
| 300   | 1527.8                | 121.0                | 1587.5                 | 56.1                 | 1612.6                 | 34.2                 | 1351.3                 | 138.6                |

Rs: Raman shift; w: width.

**Table S4.** Fitting parameters calculated for GO and TrGO Raman spectra under N<sub>2</sub>.

| N <sub>2</sub> | D''                   |                      | G                      |                      | D'                     |                      | D                      |                      |
|----------------|-----------------------|----------------------|------------------------|----------------------|------------------------|----------------------|------------------------|----------------------|
| T(°C)          | Rs(cm <sup>-1</sup> ) | w(cm <sup>-1</sup> ) | Rs (cm <sup>-1</sup> ) | w(cm <sup>-1</sup> ) | Rs (cm <sup>-1</sup> ) | w(cm <sup>-1</sup> ) | Rs (cm <sup>-1</sup> ) | w(cm <sup>-1</sup> ) |
| 25             | 1523.1                | 200.0                | 1581.6                 | 66.1                 | 1610.2                 | 36.5                 | 1349.3                 | 135.0                |
| 50             | 1527.6                | 124.6                | 1580.0                 | 57.9                 | 1608.3                 | 37.3                 | 1349.4                 | 133.5                |
| 100            | 1522.3                | 133.2                | 1580.0                 | 61.2                 | 1609.1                 | 36.9                 | 1347.8                 | 132.0                |
| 130            | 1530.8                | 118.5                | 1584.3                 | 55.1                 | 1611.3                 | 33.8                 | 1348.0                 | 132.7                |
| 150            | 1536.4                | 114.6                | 1588.6                 | 52.1                 | 1614.3                 | 31.6                 | 1350.6                 | 130.7                |
| 200            | 1536.9                | 108.6                | 1589.1                 | 52.6                 | 1615.6                 | 31.6                 | 1352.8                 | 137.9                |
| 250            | 1529.8                | 110.4                | 1586.1                 | 53.6                 | 1612.8                 | 33.5                 | 1351.5                 | 136.6                |
| 300            | 1528.6                | 114.0                | 1585.2                 | 54.6                 | 1613.0                 | 33.4                 | 1351.7                 | 138.7                |



## 8. PXRD characterization

PXRD diffractograms have been acquired using a D8 Advanced with twin-twin optics (Bruker). The diffraction patterns of the powder samples have been acquired in 5-40 ( $2\theta$ ) range in Bragg-Brentano configuration, using  $\text{Cu}_{K\alpha}$  radiation and a LINXEYE 2 detector. Two 2.5 mm Soller Cu slits have been applied to the primary and secondary optics. In the latter, a Ni stopper has been added to filter  $\text{Cu}_{K\beta}$  radiations. An automatized blade has been mounted to limit the contribution of air scattering at low angles. The data has been acquired with a step of  $0.02^\circ$  and an acquisition time of 0.2 s per step.

### Calculation of the XRD parameters

From the XRD diffractograms the peak position has been calculated using the Bragg's law:

$$d_{(hkl)} = \frac{\lambda}{2\sin \theta} \quad (1)$$

Where  $d_{(hkl)}$  is the calculated inter planar distance ( $\text{\AA}$ ),  $\lambda$  is the wavelength of the XRD source ( $\text{\AA}$ ),  $\theta$  is the scattering angle (rad). The crystallite dimension has been derived from the Scherrer formula:

$$L_c = \frac{K\lambda}{\beta \cos \theta} \quad (2)$$

Where  $L_c$  is the crystallite dimension ( $\text{\AA}$ ),  $K$  is the shape factor equal to 0.89,<sup>14</sup>  $\beta$  is the FWHM of the diffraction peak (rad)

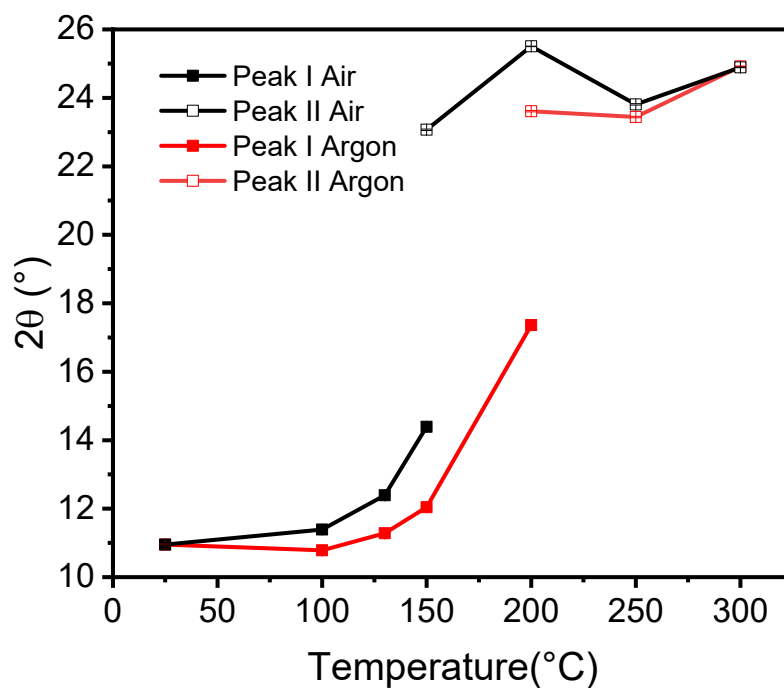

**Figure S15.** Main peak position for GO and TrGO under air (black curves) and under argon (red curves).

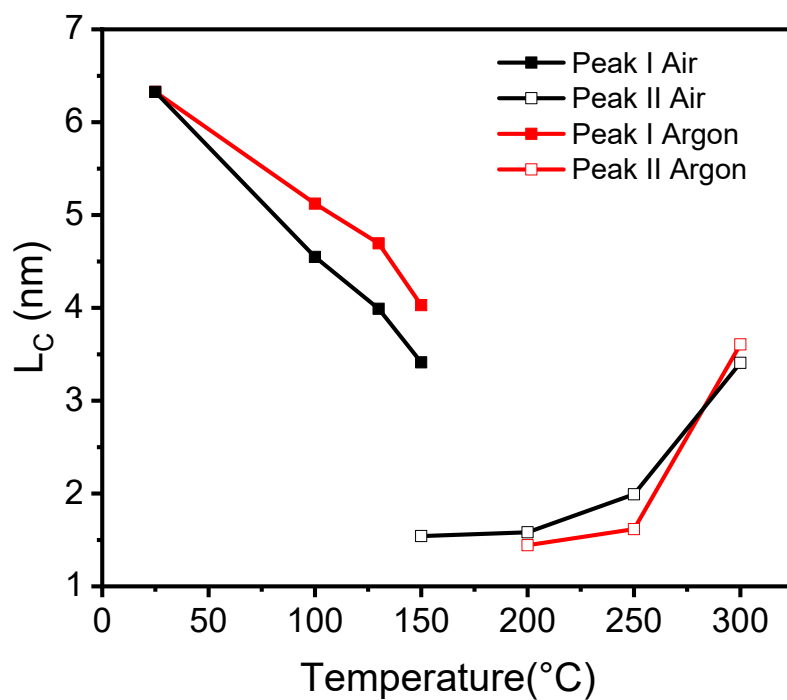

**Figure S16.** Crystallite size calculated for GO and TrGO under air (black curves) and under argon (red curves).

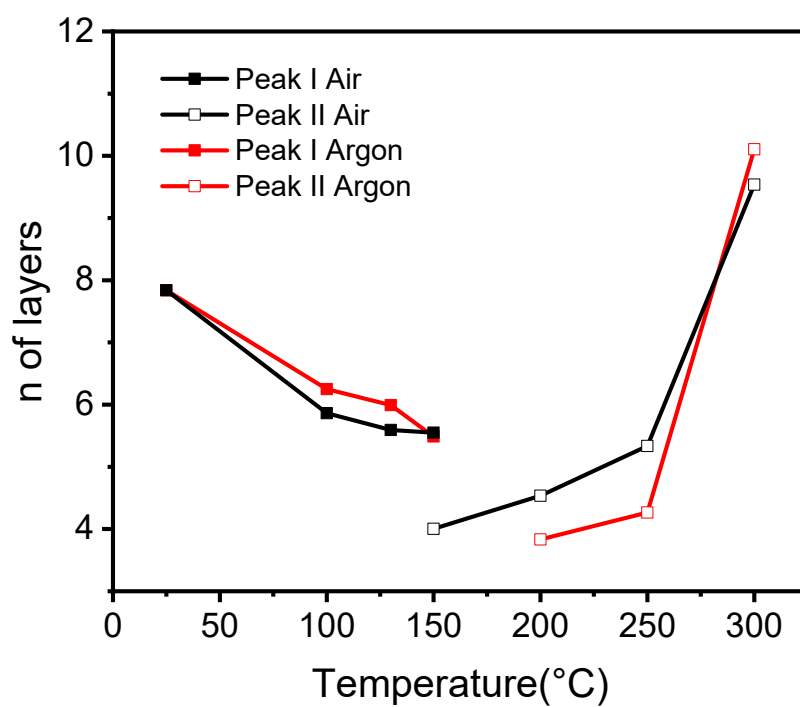

**Figure S17.** Number of GO layers for GO and TrGO under air (black curves) and under argon (red curves).

## 9. BET characterization

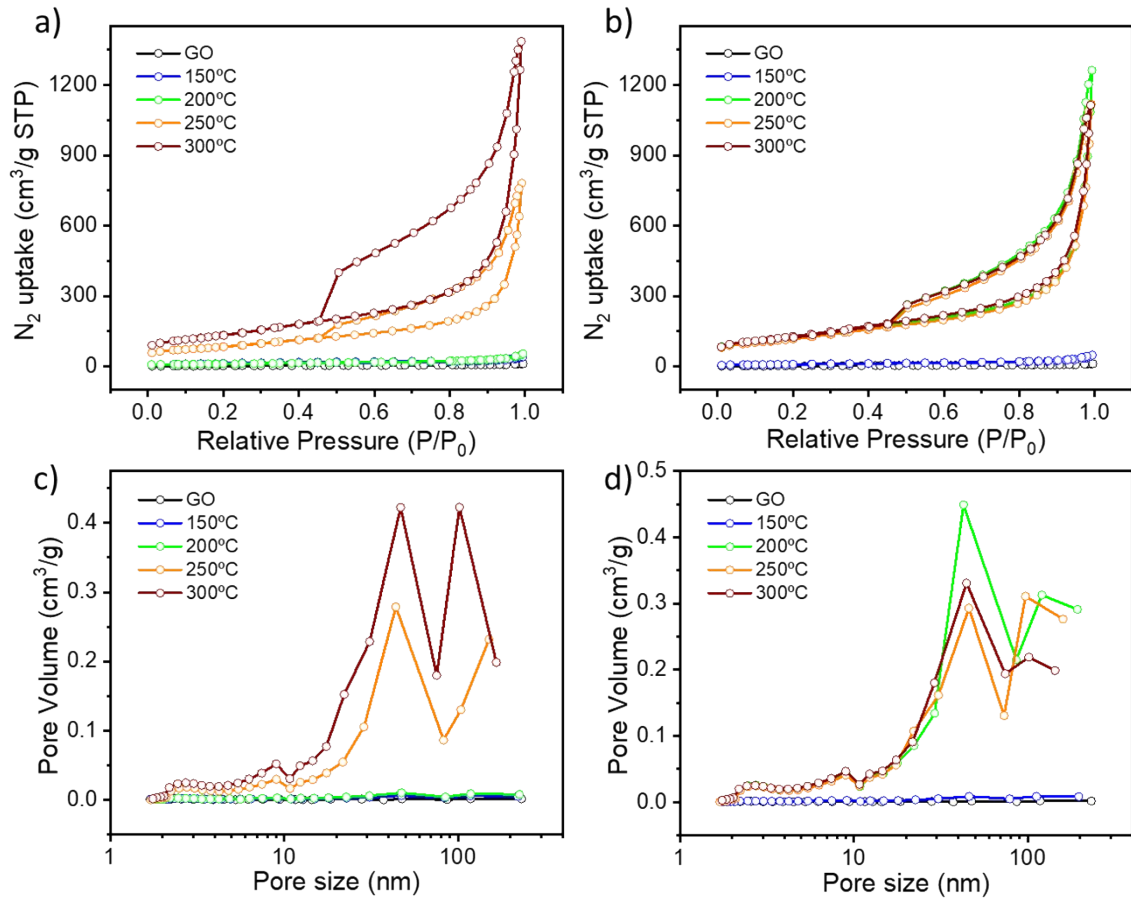

**Figure S18.** BET surface area of GO and TrGO under (a) air and (b) argon. Pore size distribution of thermally-reduced GO under (c) air and (d) argon.

**Table S5.** Average surface area and pore size of GO and TrGO.

| Temperature | Air annealing                       |                | Argon annealing                     |                |
|-------------|-------------------------------------|----------------|-------------------------------------|----------------|
|             | Surface area<br>(m <sup>2</sup> /g) | Pore size (nm) | Surface area<br>(m <sup>2</sup> /g) | Pore size (nm) |
| GO          | 12.61                               | 6.95           | 12.61                               | 6.95           |
| 150         | 32.40                               | 8.78           | 35.14                               | 8.71           |
| 200         | 44.28                               | 7.92           | 439.92                              | 16.63          |
| 250         | 302.59                              | 15.13          | 420.72                              | 15.51          |
| 300         | 480.44                              | 16.53          | 462.57                              | 13.90          |

## 10. Photoelectron Yield Spectroscopy in Air (PYSA) characterization

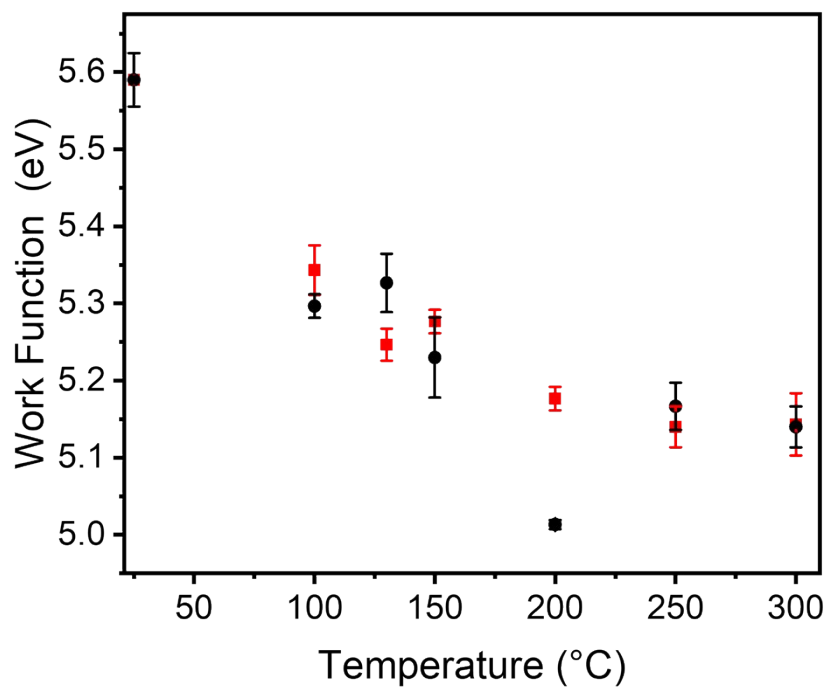

**Figure S19.** Work function of (Tr)GO annealed under air (black dots) and argon (red dots) at different temperatures for 4 hours.

## 11. Electrochemical characterization

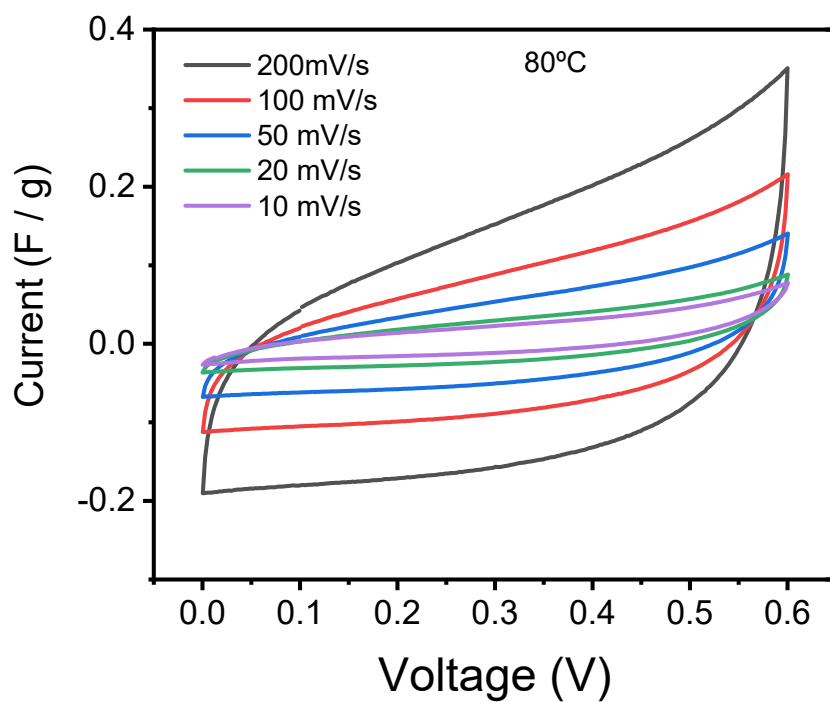

**Figure S20.** CV curves of GO at different scan rates.

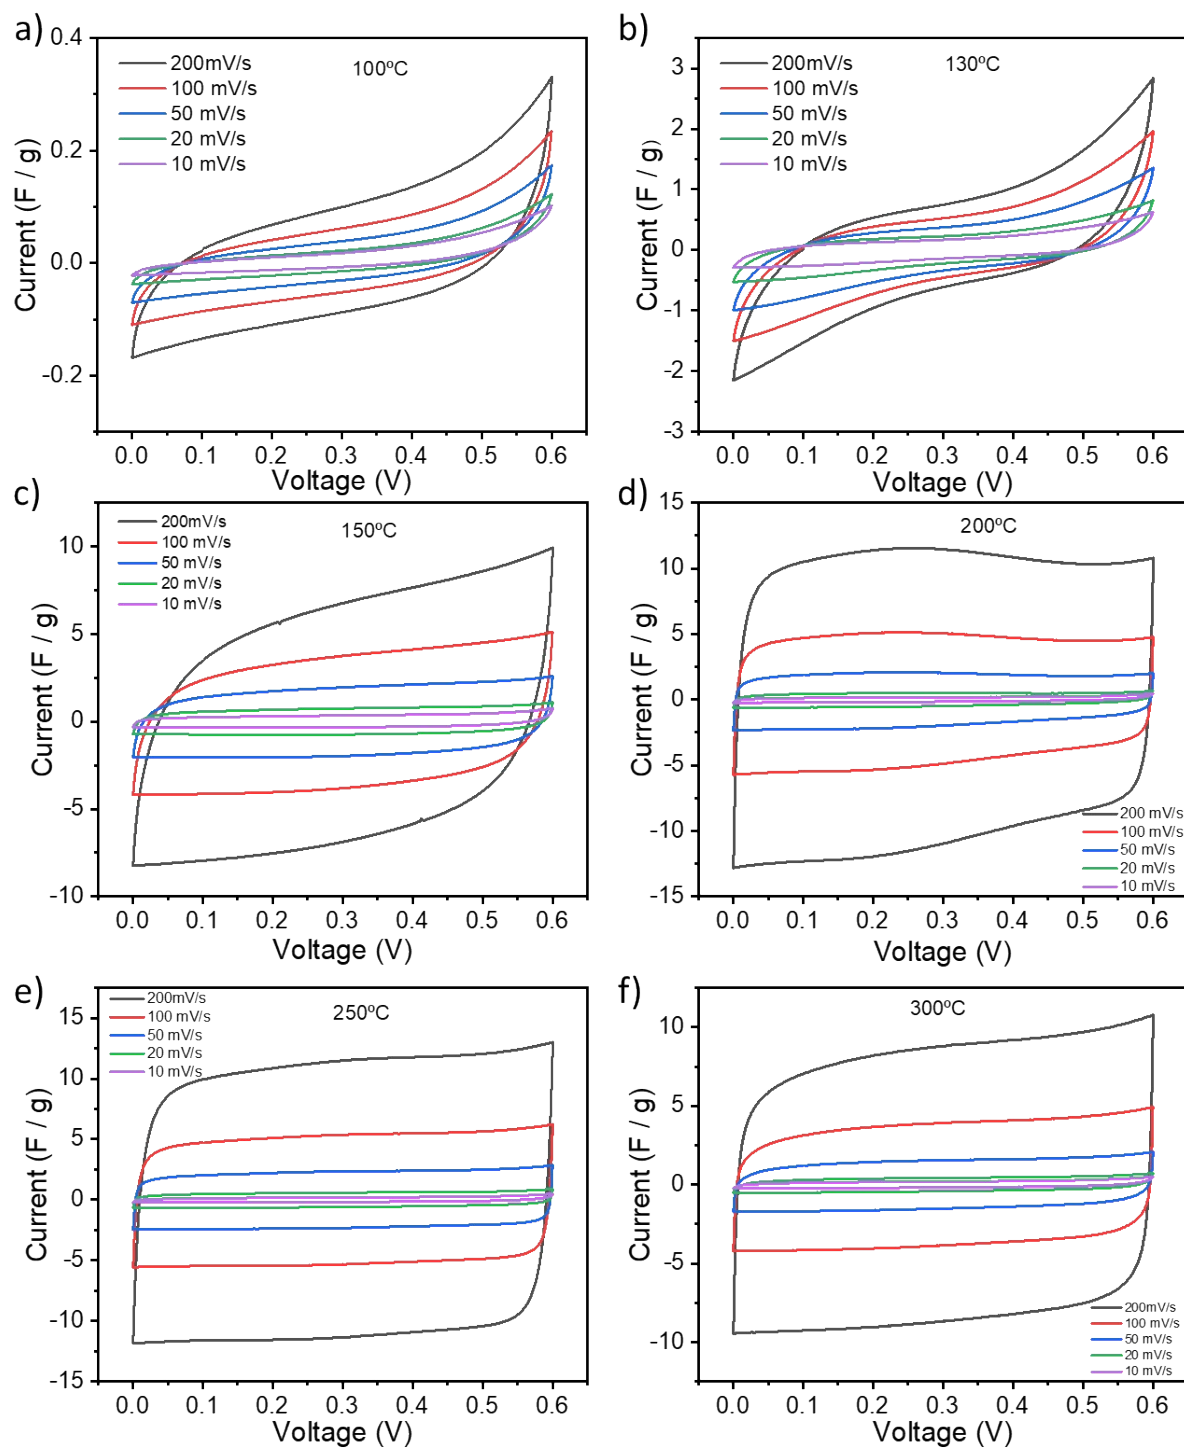

**Figure S21.** CV curves of TrGO under air at different scan rates.

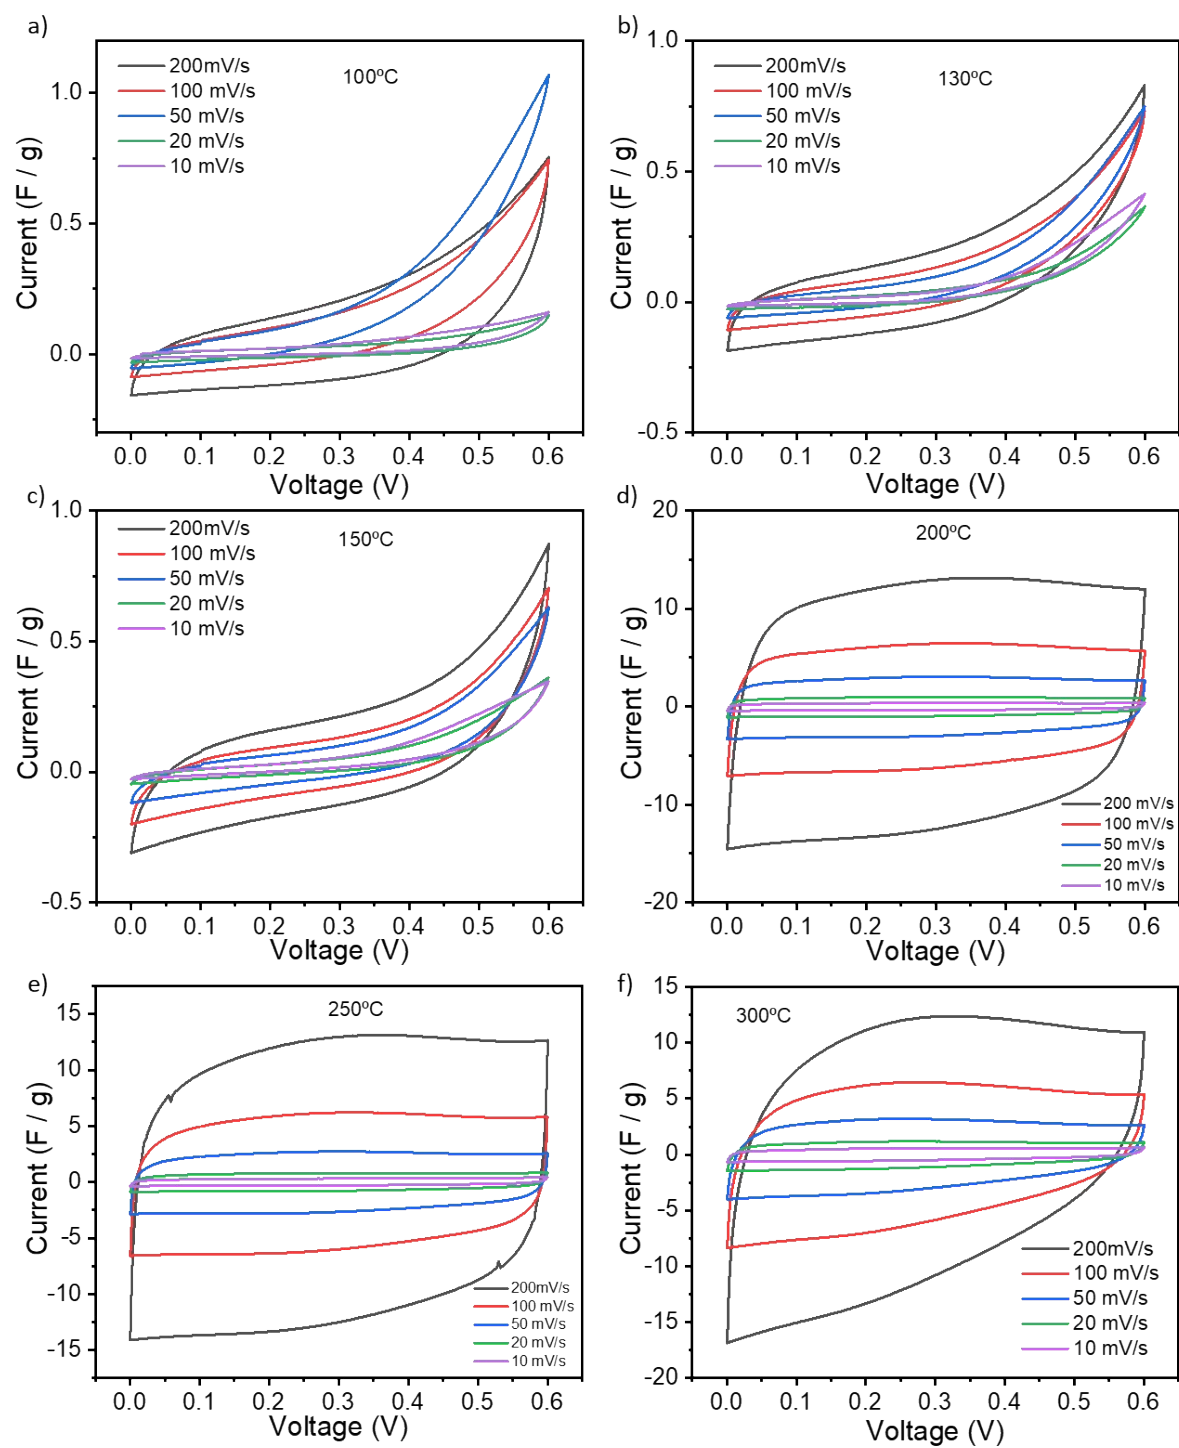

**Figure S22.** CV curves of TrGO under argon at different scan rates.



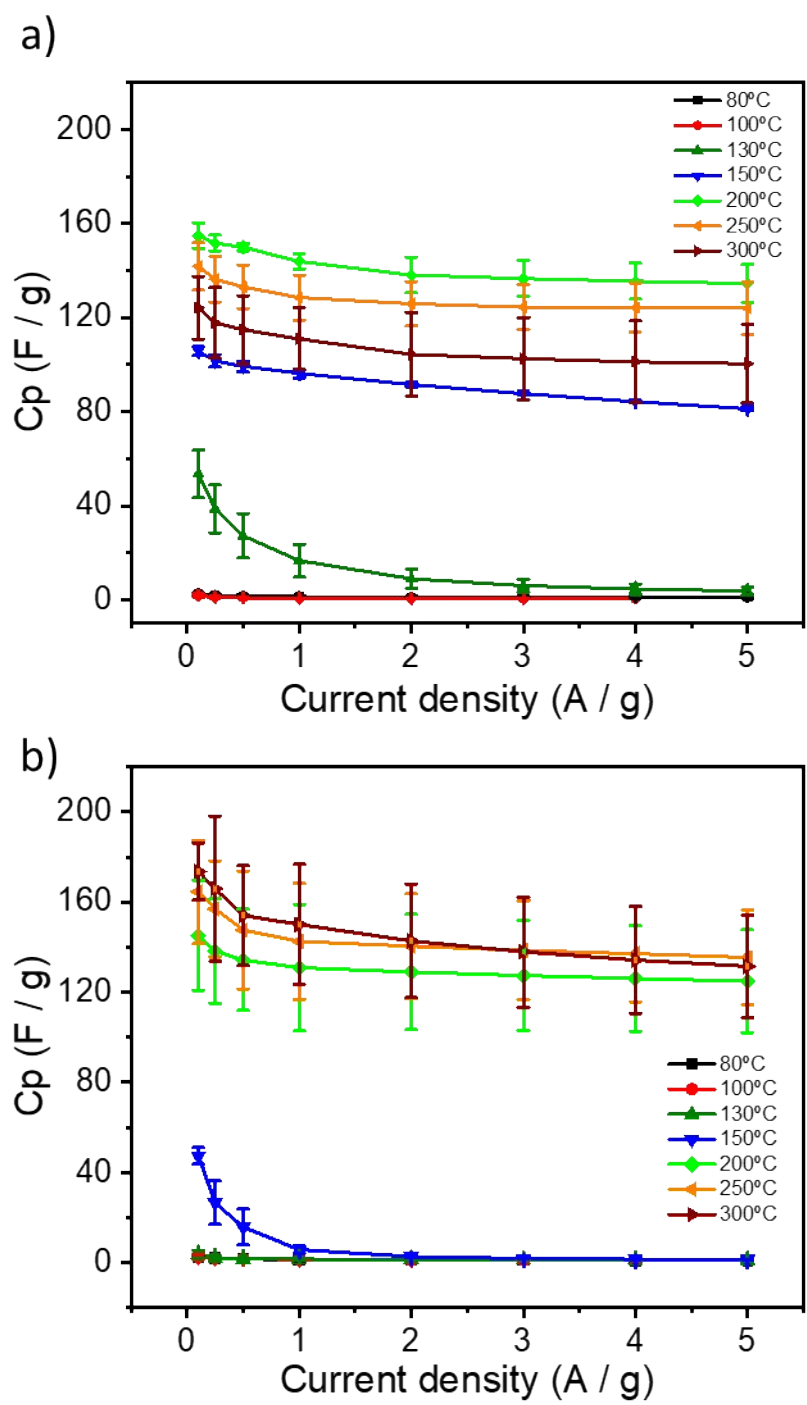

**Figure S23.** Comparison of specific capacitances versus current densities of TrGO under (a) air and (b) under argon.

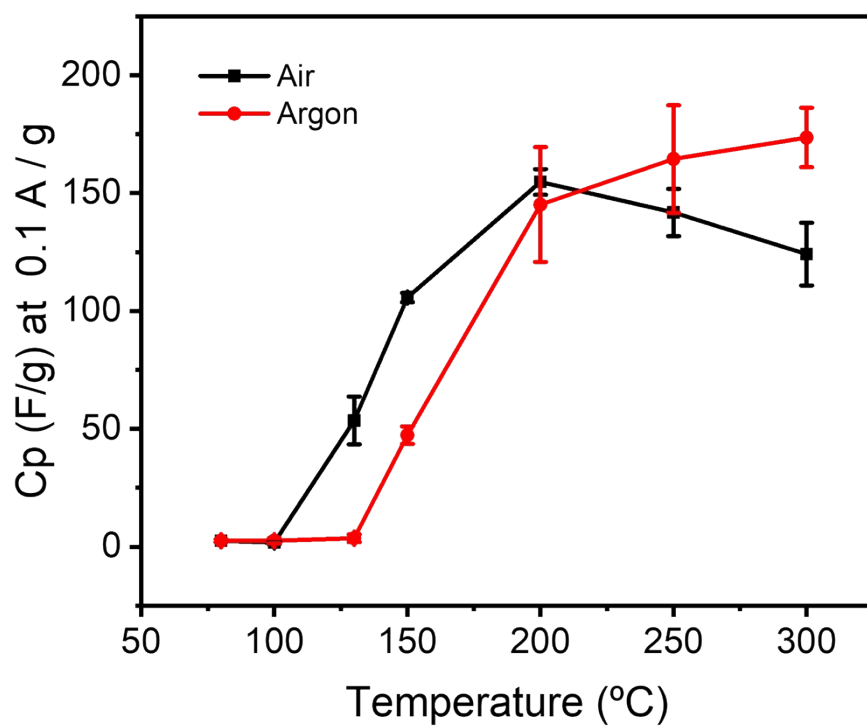

**Figure S24.** Specific capacitances at 0.1 A/g of TrGO under air (black curve) and under argon (red curve).

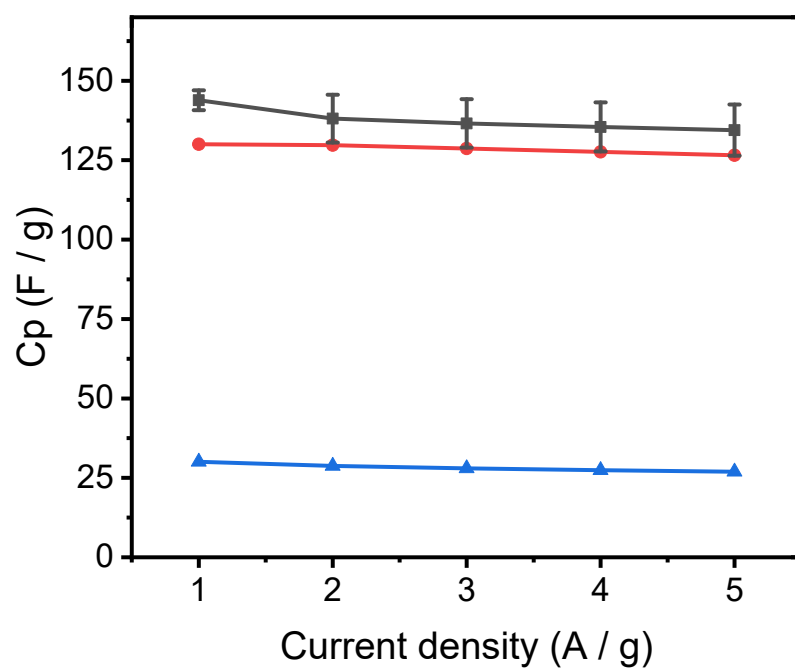

**Figure S25.** Comparison of specific capacitances versus current densities by using KOH 6 M (black curve), H<sub>2</sub>SO<sub>4</sub> 1 M (red curve) and tetraethylammonium tetrafluoroborate 1M in acetonitrile (blue curve) as electrolytes.

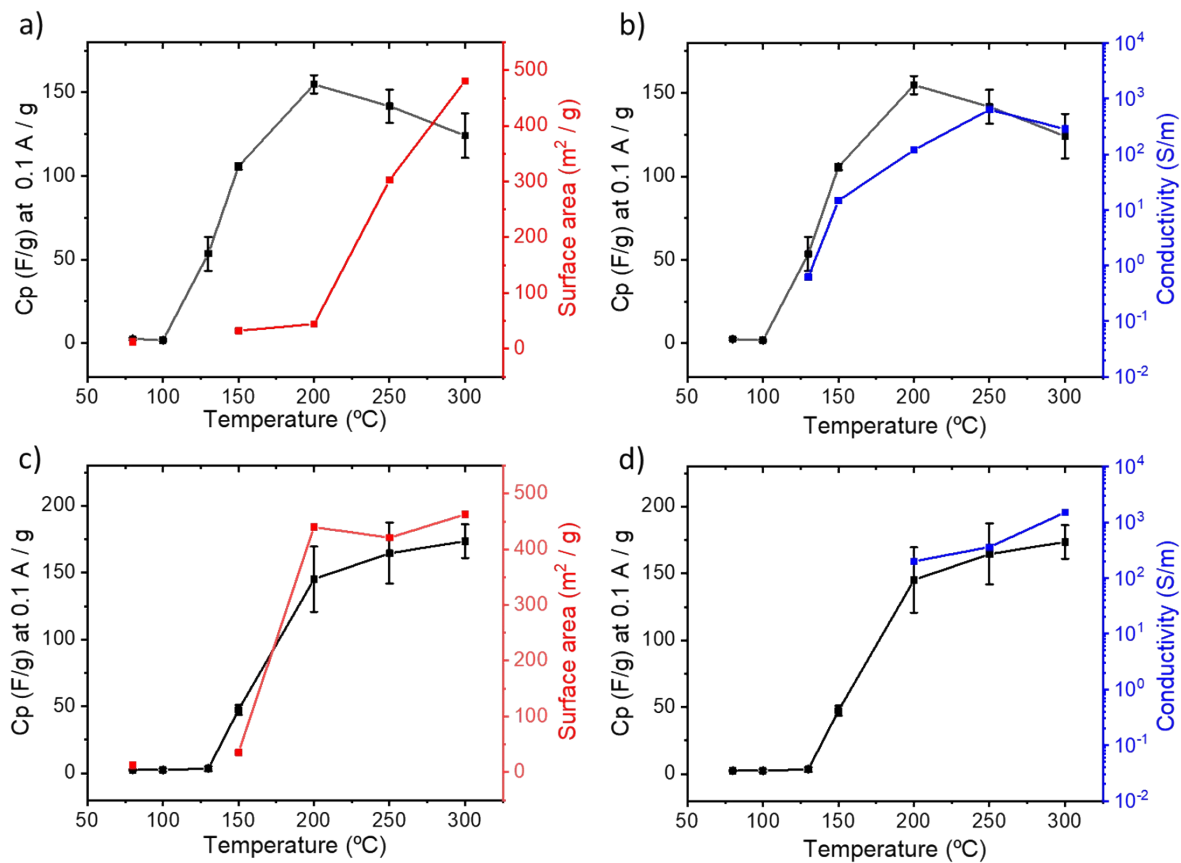

**Figure S26.** Specific capacitances at 0.1 A/g of TrGO (a, b) under air and (c, d) under argon compared with their corresponding (a, c) surface area and (b, d) film conductivity. Film conductivities were calculated by the inverse of the film resistivity of Figure 1c.

**Table S6.** State of the art TrGO as supercapacitors.

| Annealing temperature (°C) | Time     | Atmosphere     | Capacitance (F/g) | Electrolyte                          | Surface area (m <sup>2</sup> /g) | Reference |
|----------------------------|----------|----------------|-------------------|--------------------------------------|----------------------------------|-----------|
| 200                        | 4 hours  | Air            | 208 ± 3.2         | 6 M KOH                              | 325.1 ± 24.1                     | This work |
| 300                        | 4 hours  | Argon          | 177.1 ± 29.6      | 6 M KOH                              | 347.3 ± 17.6                     |           |
| 200                        | 5 hours  | High vacuum    | 264               | 30% KOH                              | 400                              | 15        |
| 200                        | 2 hours  | N <sub>2</sub> | 260               | 6 M KOH                              | 71.50                            | 6         |
| 400                        | 1 hour   | Air            | 206               | 1 M KOH                              | -                                | 16        |
| 200                        | 50 min   | Air            | 165               | 0.5 M H <sub>2</sub> SO <sub>4</sub> | -                                | 17        |
| 200                        | 12 hours | N <sub>2</sub> | 132               | 1 M H <sub>2</sub> SO <sub>4</sub>   |                                  | 18        |
| 400                        | 110 min  | N <sub>2</sub> | 96                | 5 M H <sub>2</sub> SO <sub>4</sub>   | 429                              | 19        |
| 200                        | 1 hour   | Argon          | 201               | 5 M KOH                              | 248                              | 20        |

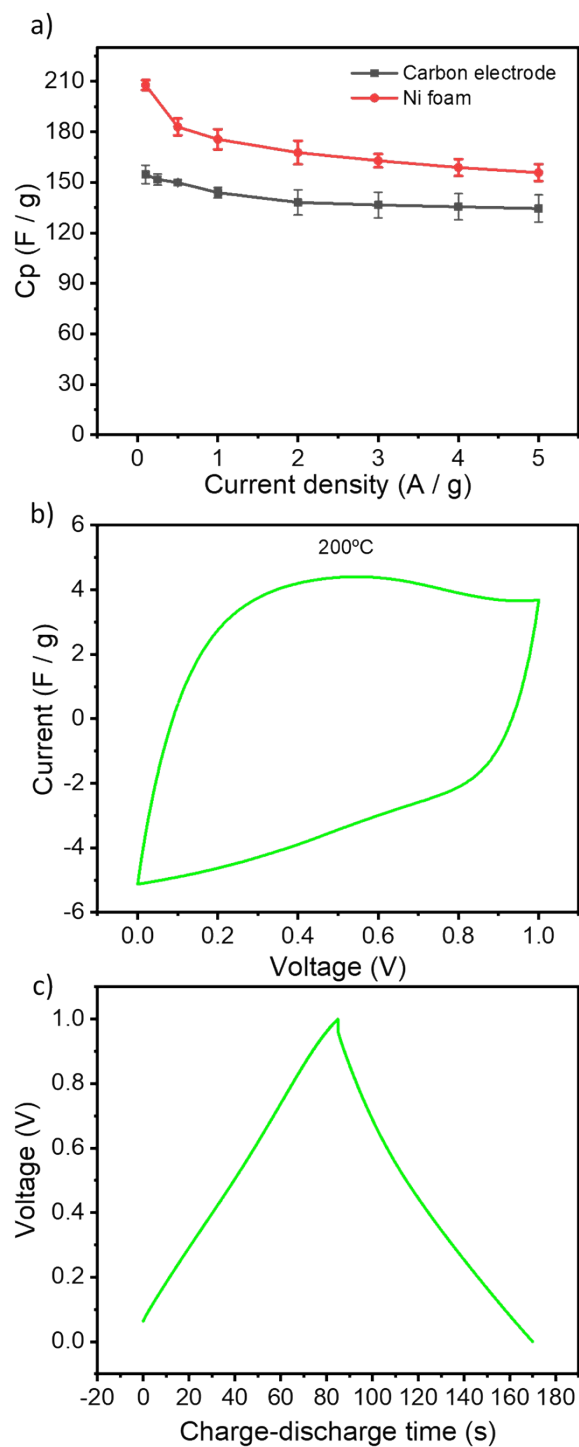

**Figure S27.** Current collector optimization for TrGO at 200°C under air and KOH 6 M as electrolyte. (a) Comparison of specific capacitances versus current densities by using carbon electrode (black curve), and Ni foam (red curve). (b) CV curve at the scan rate of 50 mV/s and (c) GCD curves at the current density of 1 A/g by using Ni foam as current collector.

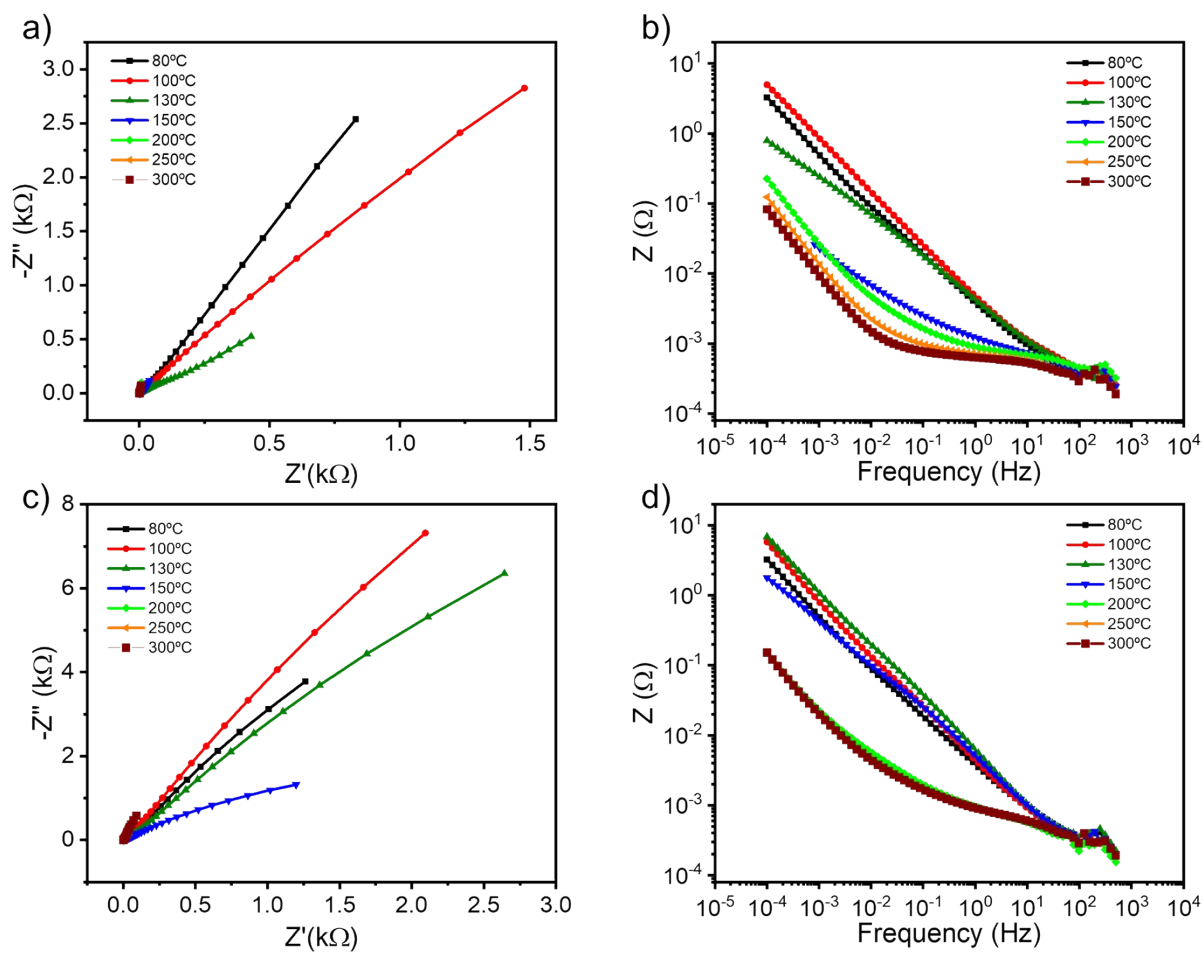

**Figure S28.** Nyquist and Bode plots of TrGO at different temperatures (a, c) under air and (b, d) under argon.

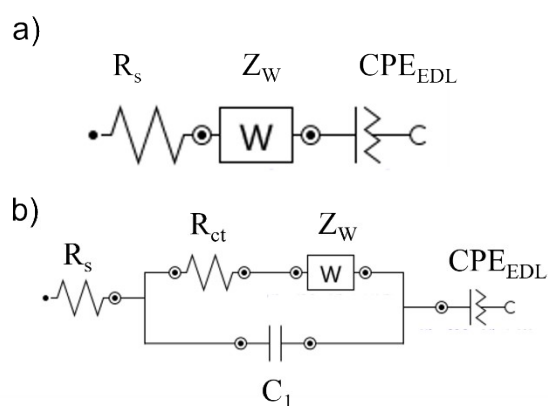

**Scheme 1.** The equivalent electric circuit models used for fitting the Nyquist plots.  $R_s$ : the intrinsic ohmic resistance;  $R_{ct}$ : charge transfer resistance;  $C_1$ : capacitance element;  $CPE_{EDL}$ : constant phase element representing the electrical double layer capacitance (EDLC);  $Z_w$ : a generalized finite Warburg element. The circuit a) is used to fit GO and TrGO under air (100-130°C) and under argon (100-150°C) samples. The circuit b) is used to fit TrGO under air (150-300°C) and under argon (200-300°C) samples.

**Table S7.** Fitting parameters obtained from the Nyquist plots.

| Annealing temperature (°C) | Air        |               | Argon      |               |
|----------------------------|------------|---------------|------------|---------------|
|                            | $R_s$ (mΩ) | $R_{ct}$ (mΩ) | $R_s$ (mΩ) | $R_{ct}$ (mΩ) |
| 80                         | 207        | -             | 207        | -             |
| 100                        | 308        | -             | 198        | -             |
| 130                        | 193        | -             | 247        | -             |
| 150                        | 288        | 364           | 202        | -             |
| 200                        | 300        | 387           | 195        | 366           |
| 250                        | 238        | 346           | 201        | 380           |
| 300                        | 238        | 346           | 208        | 406           |



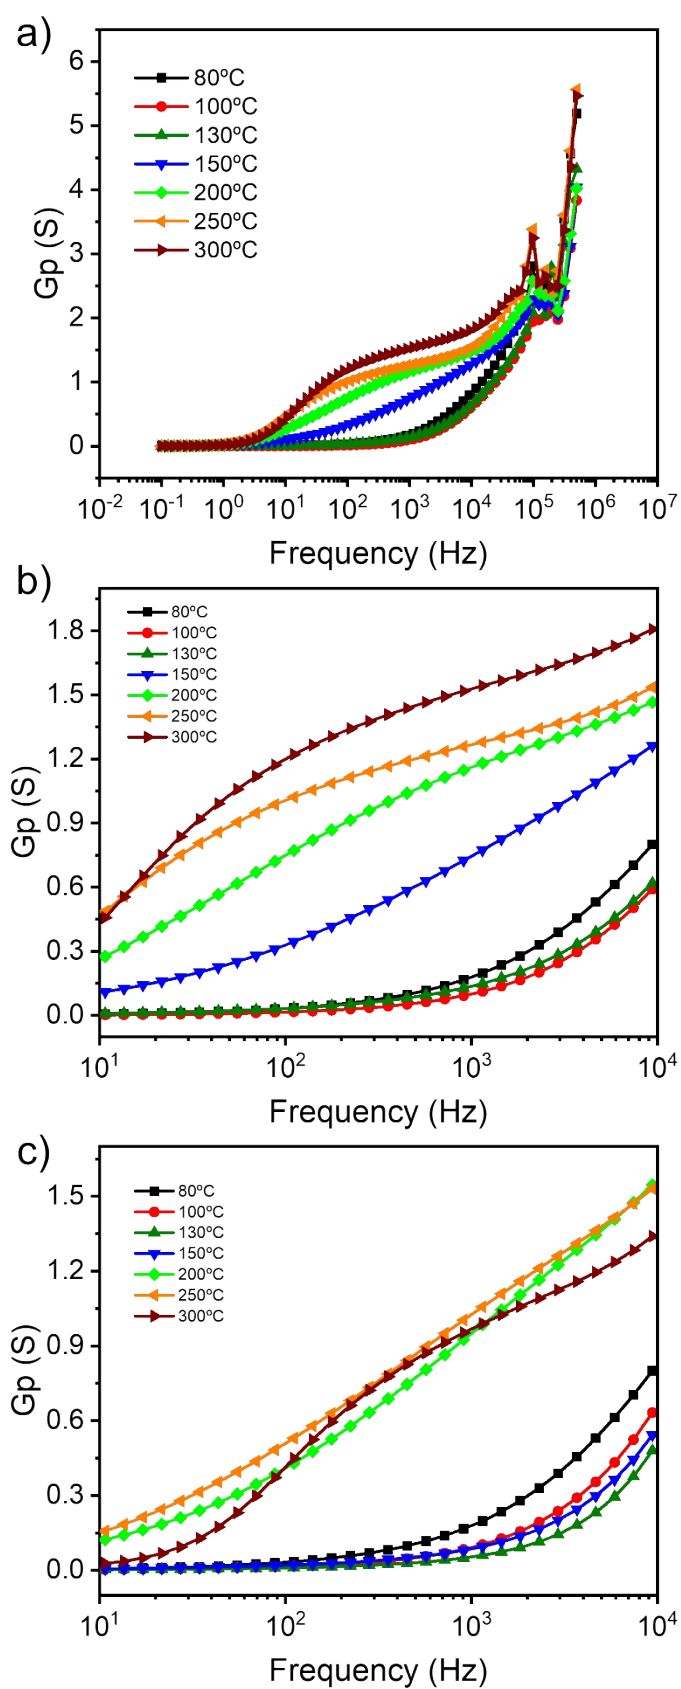

**Figure S29.** Conductance plots of TrGO at different temperatures (a, b) under air and (c) under argon.

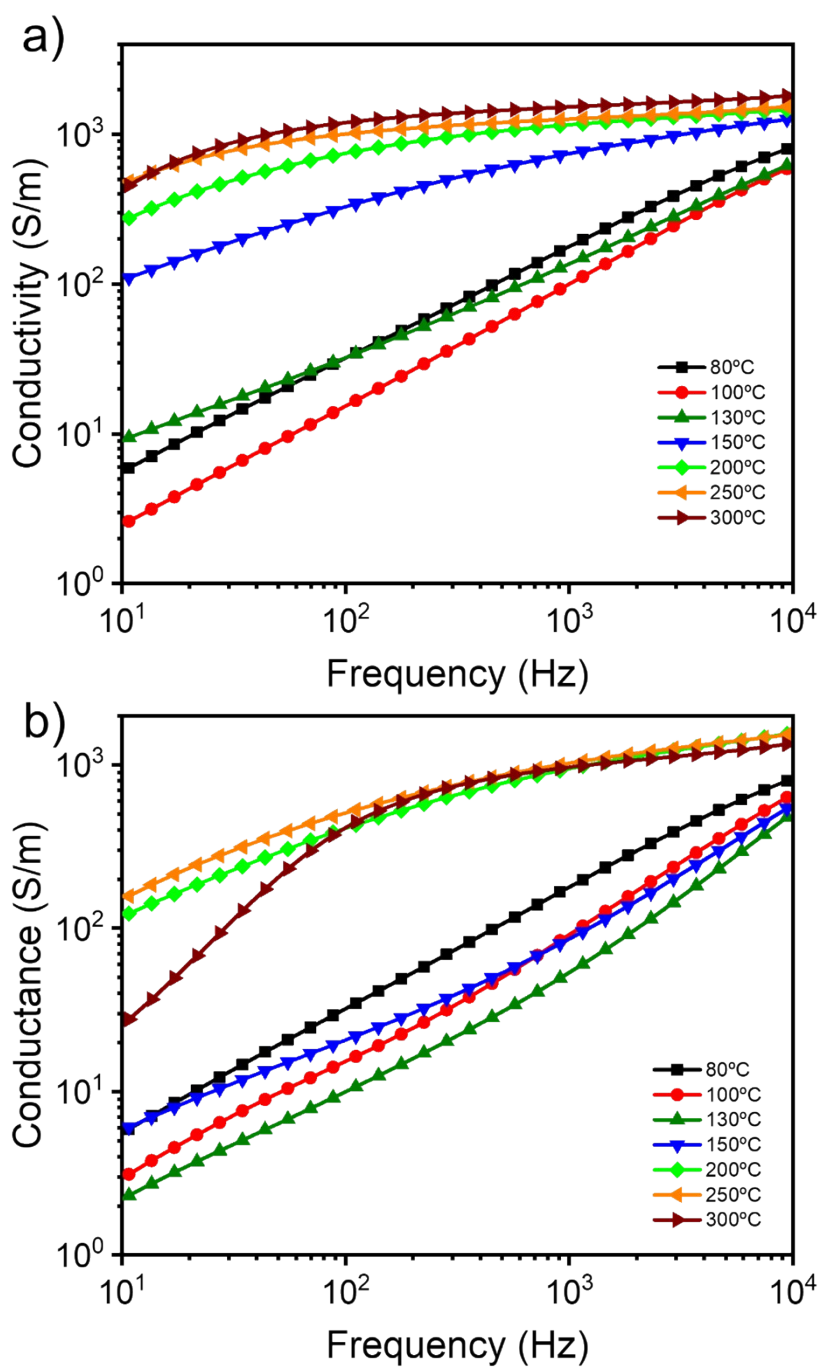

**Figure S30.** Conductivity plots of TrGO at different temperatures (a) under air and (b) under argon.

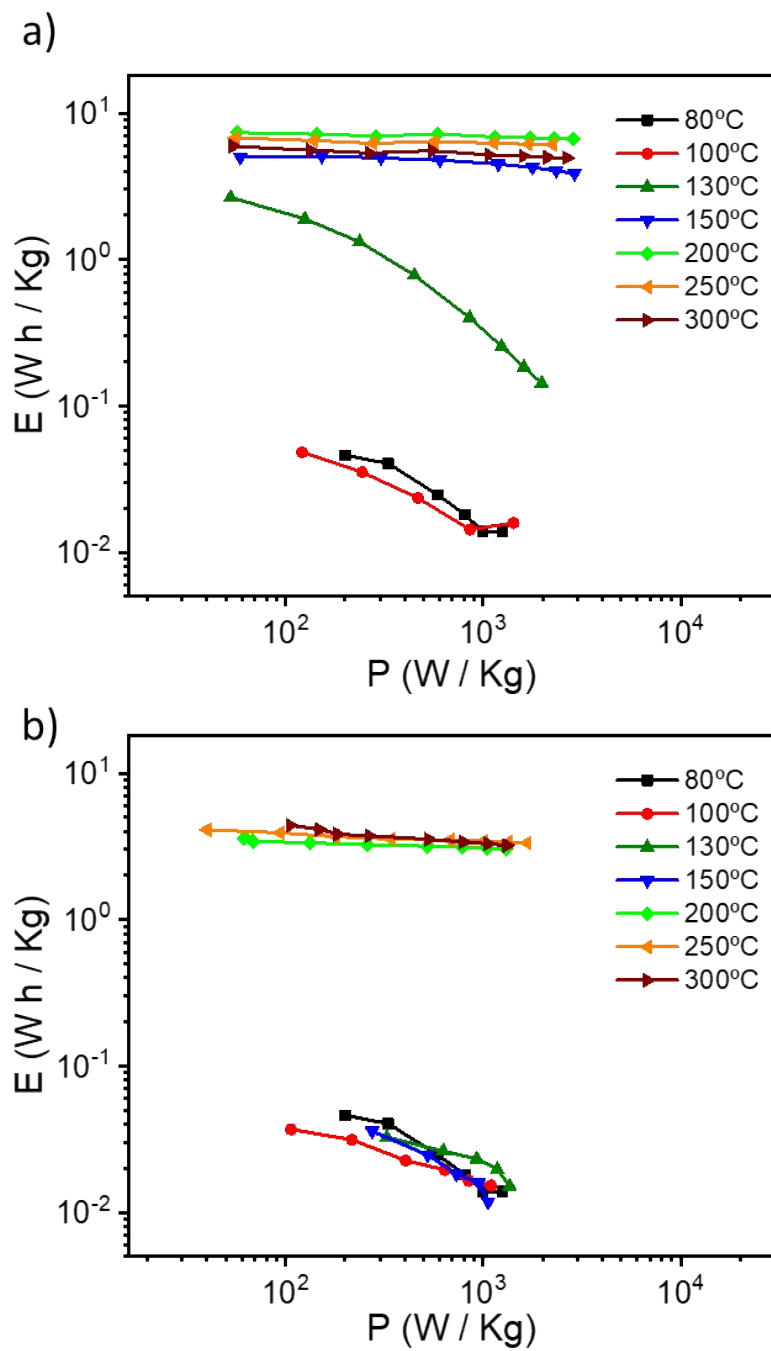

**Figure S31.** Ragone plot for TrGO at 200 °C (a) under air and (b) under argon.

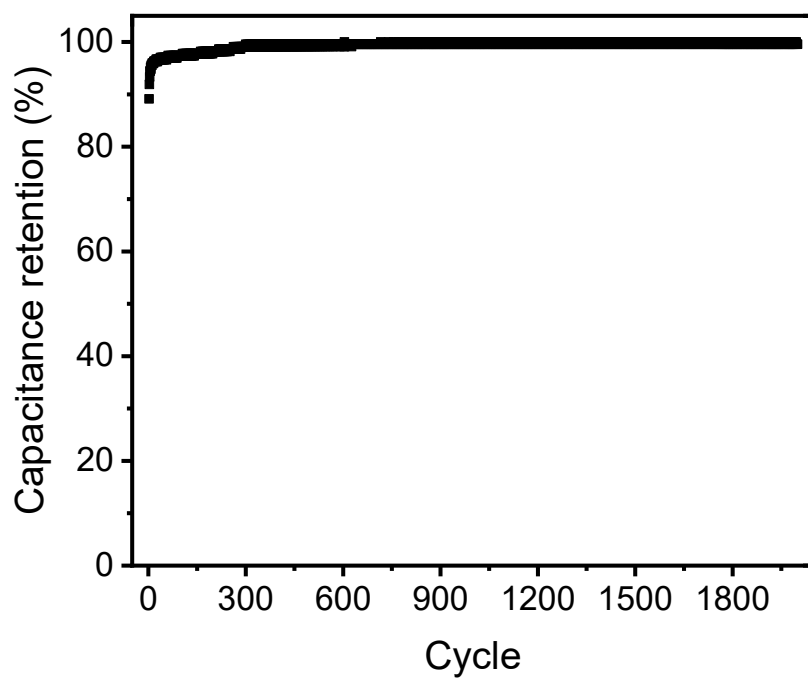

**Figure S32.** Cyclic stability of TrGO at 200°C under air at the current density of 3 A/g.

## References

1. I. Jung, D. A. Dikin, R. D. Piner and R. S. Ruoff, *Nano Lett.*, 2008, **8**, 4283-4287.
2. C. Mattevi, G. Eda, S. Agnoli, S. Miller, K. A. Mkhoyan, O. Celik, D. Mastrogiovanni, G. Granozzi, E. Garfunkel and M. Chhowalla, *Adv. Funct. Mater.*, 2009, **19**, 2577-2583.
3. I. Jung, D. A. Field, N. J. Clark, Y. Zhu, D. Yang, R. D. Piner, S. Stankovich, D. A. Dikin, H. Geisler, C. A. Ventrice and R. S. Ruoff, *J. Phys. Chem. C*, 2009, **113**, 18480-18486.
4. W. Chen and L. Yan, *Nanoscale*, 2010, **2**, 559-563.
5. K. Yin, H. Li, Y. Xia, H. Bi, J. Sun, Z. Liu and L. Sun, *Nano-Micro Lett.*, 2011, **3**, 51-55.
6. B. Zhao, P. Liu, Y. Jiang, D. Pan, H. Tao, J. Song, T. Fang and W. Xu, *J. Power Sources*, 2012, **198**, 423-427.
7. P. V. Kumar, N. M. Bardhan, S. Tongay, J. Wu, A. M. Belcher and J. C. Grossman, *Nature Chem.*, 2014, **6**, 151-158.
8. Y. Qiu, F. Guo, R. Hurt and I. Külaots, *Carbon*, 2014, **72**, 215-223.
9. B. C. Kim, W. J. Cho, W. G. Lee, S. J. Kim, R. Jalili, S. Y. Park, G. G. Wallace, K. H. Yu and S. J. Chang, *Synth. Met.*, 2014, **193**, 110-116.
10. A. M. Jastrzębska, J. Karcz, R. Letmanowski, D. Zabost, E. Ciecierska, J. Zdunek, E. Karwowska, M. Siekierski, A. Olszyna and A. Kunicki, *Appl. Surf. Sci.*, 2016, **362**, 577-594.
11. O. M. Slobodian, P. M. Lytvyn, A. S. Nikolenko, V. M. Naseka, O. Y. Khyzhun, A. V. Vasin, S. V. Sevostianov and A. N. Nazarov, *Nanoscale Res Lett* 2018, **13**, 139.
12. M. Tas, Y. Altin and A. Celik Bedeloglu, *Diam. Relat. Mater*, 2019, **92**, 242-247.
13. V. M. Maphiri, G. Rutavi, N. F. Sylla, S. A. Adewinbi, O. Fasakin and N. Manyala, *Nanomaterials*, 2021, **11**, 1909.
14. D. J. Lim, N. A. Marks and M. R. Rowles, *Carbon*, 2020, **162**, 475-480.
15. W. Lv, D. M. Tang, Y. B. He, C.-H. You, Z.-Q. Shi, X. C. Chen, C.-M. Chen, P. X. Hou, C. Liu and Q. H. Yang, *ACS Nano*, 2009, **3**, 3730-3736.
16. Z. Li, S. Gadipelli, Y. Yang and Z. Guo, *Small*, 2017, **13**, 1702474.
17. L. P. Bakos, L. Sárvári, K. László, J. Mizsei, Z. Kónya, G. Halasi, K. Hernádi, A. Szabó, D. Berkesi, I. Bakos and I. M. Szilágyi, *Nanomaterials*, 2020, **10**, 2313.
18. L. T. Le, M. H. Ervin, H. Qiu, B. E. Fuchs and W. Y. Lee, *Electrochem. commun.*, 2011, **13**, 355-358.
19. H. Zhang, V. V. Bhat, N. C. Gallego and C. I. Contescu, *ACS Appl. Mater. Interfaces*, 2012, **4**, 3239-3246.
20. H. Cao, X. Peng, M. Zhao, P. Liu, B. Xu and J. Guo, *RSC Adv.*, 2018, **8**, 2858-2865.
